# 1 **Canopy position has a profound effect on soybean seed composition**

2

3 Steven C Huber<sup>1,2, ^\*</sup>, Kunzhi Li<sup>2,5, ^</sup>, Randall Nelson<sup>1,2, ^</sup>, Alexander Ulanov<sup>3</sup>, Catherine M.  
4 DeMuro<sup>1, §</sup>, and Ivan Baxter<sup>4\*</sup>

5

6 <sup>1</sup>US Department of Agriculture, Agricultural Research Service, Global Change and  
7 Photosynthesis Research Unit, Urbana, IL, USA.

8 <sup>2</sup>Plant Biology Department, University of Illinois, Urbana-Champaign, IL, USA.

9 <sup>3</sup>Metabolomics Facility, Carver Biotechnology Center, University of Illinois, Urbana-  
10 Champaign, IL, USA.

11 <sup>4</sup>US Department of Agriculture, Agricultural Research Service, Danforth Research Center, St.  
12 Louis, MO, USA.

13 <sup>5</sup>Lab of plant nutrition genetic engineering, Biotechnology Research Center, Faculty of Life  
14 Science and Biotechnology, Kunming University of Science and Technology, Chenggong  
15 Campus Chenggong Kunming 650500, China

16

17 <sup>^</sup>These authors contributed equally to this work

18 <sup>\*</sup>Correspondence: [ivan.baxter@ars.usda.gov](mailto:ivan.baxter@ars.usda.gov) or [schuber1@illinois.edu](mailto:schuber1@illinois.edu)

19

## 20 **Abstract**

21 Although soybean seeds appear homogeneous, their composition (protein, oil and mineral  
22 concentrations) can vary significantly with the canopy position where they were produced. In  
23 studies with 10 cultivars grown over a 3-yr period, we found that seeds produced at the top of the  
24 canopy have higher concentrations of protein but less oil and lower concentrations of minerals  
25 such as Mg, Fe, and Cu compared to seeds produced at the bottom of the canopy. Among  
26 cultivars, mean protein concentration (average of different positions) correlated positively with  
27 mean concentrations of S, Zn and Fe, but not other minerals. Therefore, on a whole plant basis,  
28 the uptake and allocation of S, Zn and Fe to seeds correlated with the production and allocation  
29 of reduced N to seed protein; however, the reduced N and correlated minerals (S, Zn and Fe)  
30 showed different patterns of allocation among node positions. For example, while mean  
31 concentrations of protein and Fe correlated positively, the two parameters correlated negatively  
32 in terms of variation with canopy position. Altering the microenvironment within the soybean  
33 canopy by removing neighboring plants at flowering increased protein concentration in particular  
34 at lower node positions and thus altered the node-position gradient in protein (and oil) without  
35 altering the distribution of Mg, Fe and Cu, suggesting different underlying control mechanisms.  
36 Metabolomic analysis of developing seeds at different positions in the canopy suggests that  
37 availability of free asparagine may be a positive determinant of storage protein accumulation in  
38 seeds and may explain the increased protein accumulation in seeds produced at the top of the  
39 canopy. Our results establish node-position variation in seed constituents and provide a new  
40 experimental system to identify genes controlling key aspects of seed composition. In addition,  
41 our results provide an unexpected and simple approach to link agronomic practices to improve  
42 human nutrition and health in developing countries because food products produced from seeds  
43 at the bottom of the canopy contained higher Fe concentrations than products from the top of the  
44 canopy. Therefore, using seeds produced in the lower canopy for production of iron-rich soy  
45 foods for human consumption could be important when plants are the major source of protein  
46 and human diets can be chronically deficient in Fe and other minerals.

47

48

49

## 50 **Introduction**

51 Although soybean seeds from a given plant may appear physically homogeneous, it has long  
52 been known that seed produced at the top of the canopy can have higher protein and less oil  
53 compared to seeds from the bottom of the canopy (Collins & Cartter 1956). Subsequently it was  
54 demonstrated that positional effects are observed with determinate as well as indeterminate  
55 soybeans (Escalante & Wilcox 1993a) and in normal protein as well as high-protein breeding  
56 lines (Escalante & Wilcox 1993b). While these effects on protein and oil concentrations have  
57 been documented to occur, they are nonetheless not widely recognized today and there are no  
58 insights concerning possible physiological mechanisms that may underlie these positional  
59 effects. There are many other seed constituents, in particular minerals, but the impact of canopy  
60 position on many of these seed constituents is unknown. Because legumes like soybean can  
61 contribute not only protein to the human diet but also minerals like iron (Fe) and zinc (Zn),  
62 canopy position effects on the concentrations of essential minerals could be important, especially  
63 for the health and nutrition of children and women. According to the World Health Organization,  
64 Fe deficiency is currently the most widespread mineral deficiency affecting more than 30% of  
65 the world's population (<http://www.who.int/nutrition/topics/ida/en/>). One approach to control  
66 this problem is to increase Fe intake via dietary diversification with Fe-rich foods and it is  
67 possible that variation with canopy position could be exploited.

68 Several factors affect the development of seeds at the top of the plant differently than those  
69 at the bottom of the canopy and therefore could be responsible for differences in seed  
70 composition at maturity. First, flowering in the indeterminate soybean plants as used in the  
71 present study occurs first at lower nodes; thus, there is the potential for seeds lower in the canopy  
72 to develop over a longer period. However, while there is a lot of information about node  
73 position and flowering, there are few reports that have documented differences in duration of the  
74 seed fill period (SFP) as a function of node, as was demonstrated in cultivar 'Williams79'  
75 (Raboy & Dickinson 1987). A second factor is that seeds lower in the canopy also develop  
76 under altered environmental conditions in terms of temperature, irradiance, light quality and  
77 humidity, which are recognized to impact soybean seed composition (Carrera et al. 2009; Carrera  
78 et al. 2011; Wolf et al. 1982). Therefore, the role of canopy microenvironment on seed  
79 composition warrants consideration.

80 In the present study, we grew a core group of ten soybean lines in Urbana, IL, over a 3-  
81 yr period and monitored seed composition (protein, oil and mineral element concentration) at  
82 maturity as a function of node position. In general, there was a continuum in composition with  
83 seed that developed at the top of the canopy having more protein but less oil and reduced  
84 concentrations of minerals such as Mg, Fe, and Cu compared to seeds produced at the bottom of  
85 the canopy. Of particular note was the variation in Fe concentration, which was generally ~20%  
86 higher in seeds from the bottom of the canopy. The differences in mineral concentrations such  
87 as Fe could have direct impact on use of soybeans for human food in countries that primarily  
88 depend on plant protein sources for intake of minerals. We also tested several possible  
89 developmental and micro-environmental factors for their ability to influence the seed  
90 compositional gradients, and used metabolomic profiling of developing seeds to investigate  
91 biochemical determinants of the protein and oil gradients. Collectively, the results establish a  
92 new type of seed heteromorphism in soybean where seeds appear physically homogenous but  
93 differ in composition and provide new insights to some of the underlying factors that may be  
94 responsible for the gradients in composition from bottom to top of the canopy.

95

## 96 **Results**

### 97 **Canopy position affects soybean seed protein, oil and mineral concentrations**

98 We investigated positional effects with a core group of ten soybean lines (**Table S1**) grown in  
99 Urbana, IL, over a 3-year period. Main stems were harvested at maturity and divided into four  
100 canopy position quadrants (**Fig. 1**) and the seeds collected from each quadrant were analyzed  
101 separately for major storage products (protein and oil) and various minerals. Representative  
102 results obtained for one cultivar ('Chamberlain') are presented in **Fig. 2A**. As shown, protein  
103 concentration increased with node position at which seeds developed going from bottom to top  
104 of the mainstem while oil and iron (Fe) concentration decreased. For both protein and oil, which  
105 are the major seed constituents, there was variation in the absolute concentrations among the 3  
106 years of study, but general trends were similar. Differences in absolute concentrations among  
107 years was most apparent for protein concentration with highest levels obtained in 2010 and  
108 lowest in 2011, presumably reflecting the impact of weather on seed development and  
109 composition. Another confounding source of variation for canopy position analysis is genotype,

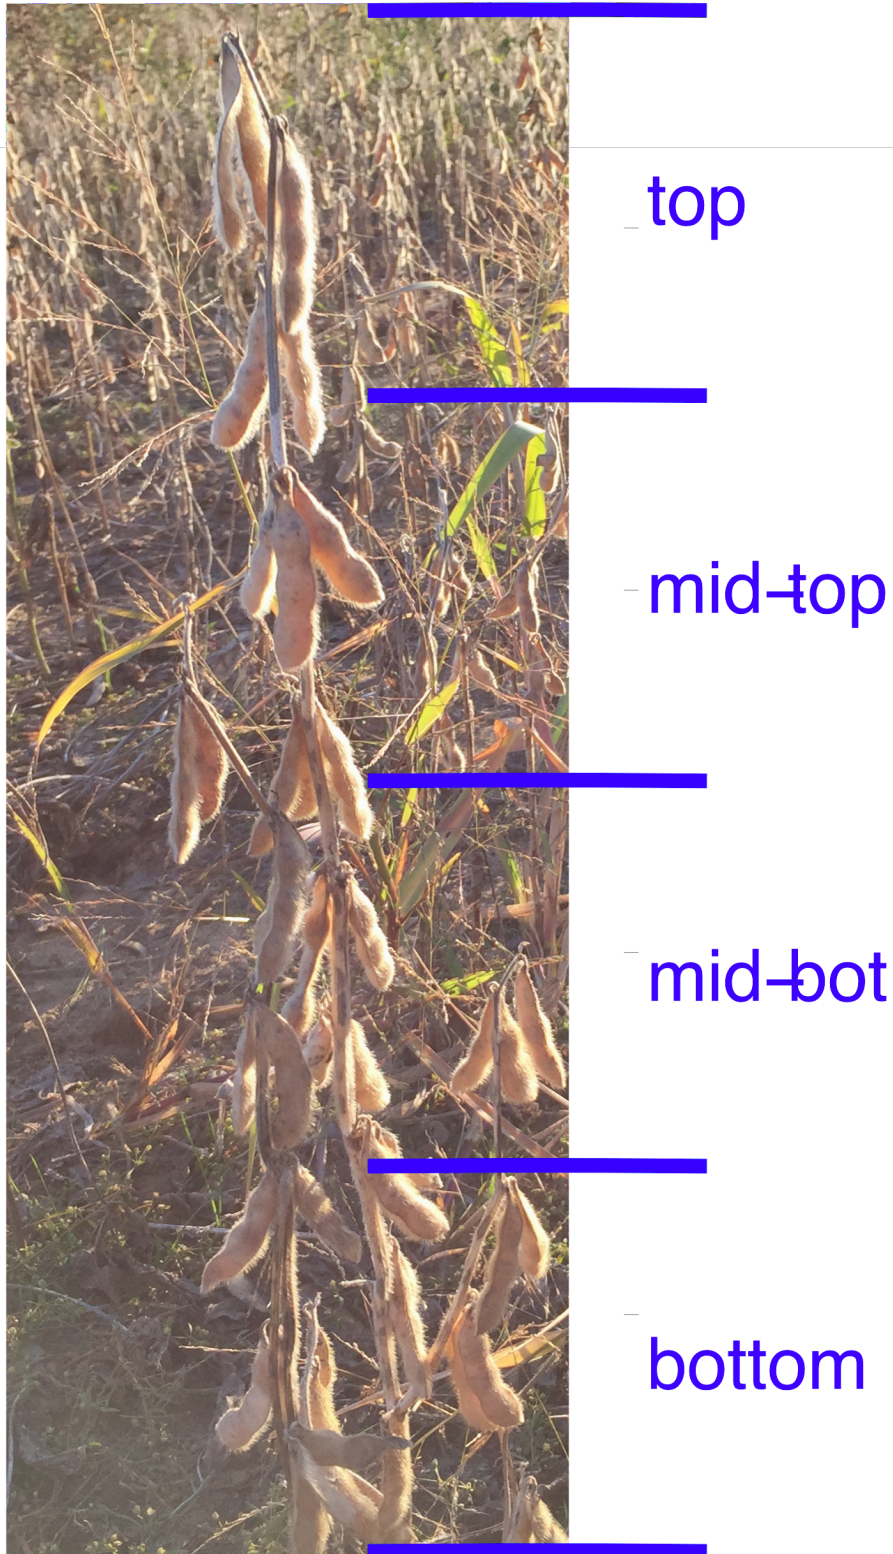

**Figure 1.** Quadrants of a Soybean Plant. The mature plant is divided up into quadrants upon harvest and each quadrant is analyzed separately. Plat normalized data uses the average of all four quadrants to normalize year, plot and line affects.

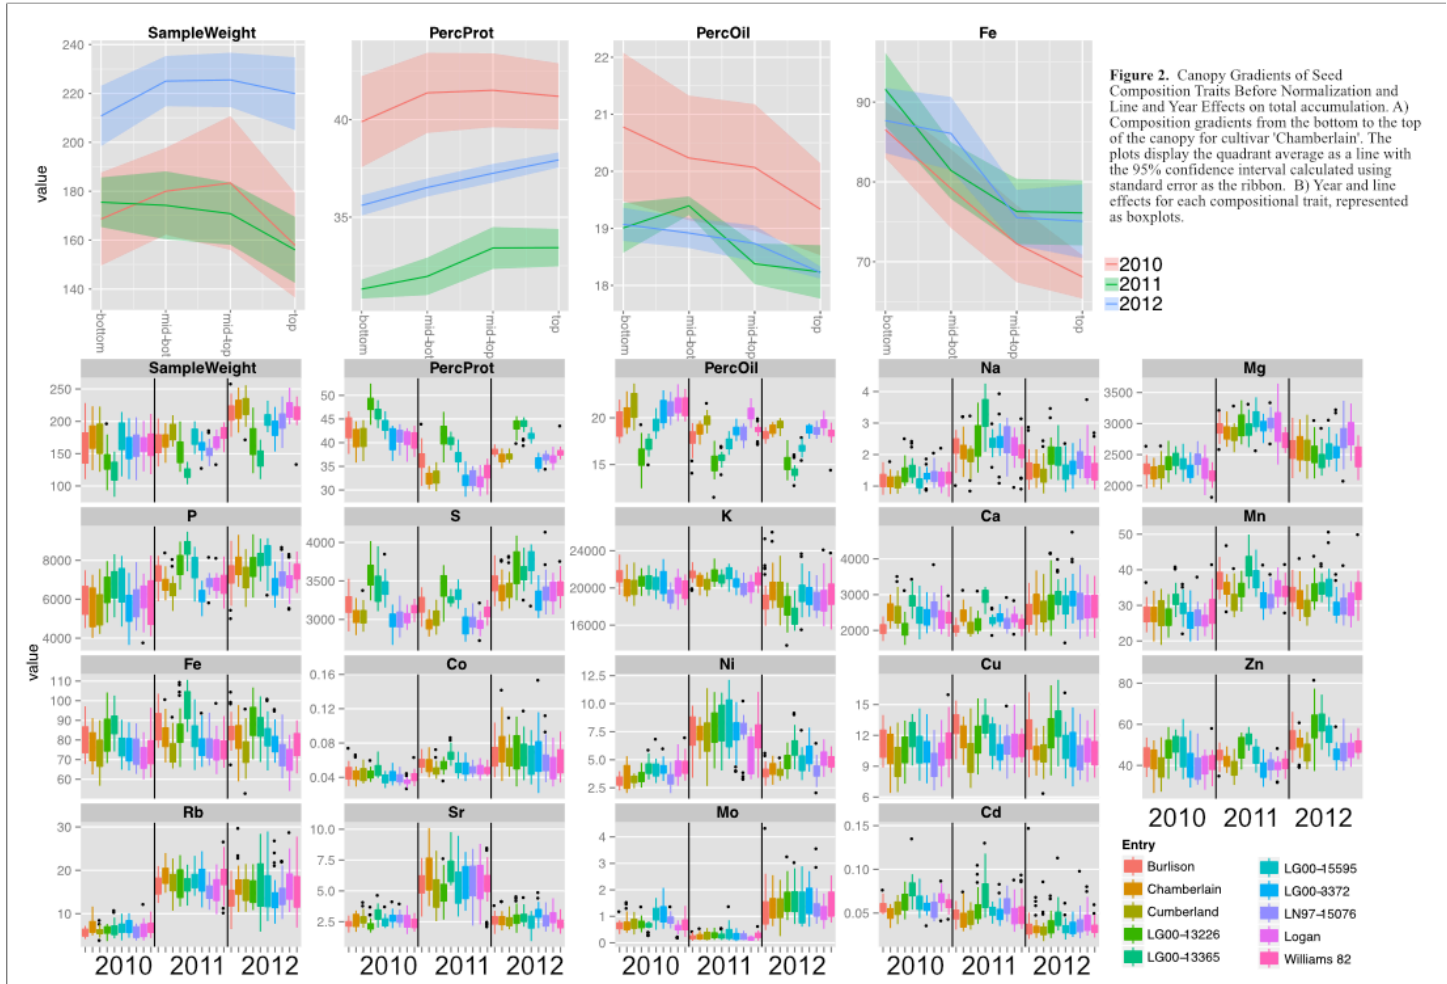

110 and **Fig. 2B** highlights the substantial variation in absolute concentrations of seed constituents  
111 due to both genotype and year.

112 In order to compare positional effects for various parameters across genotypes and years  
113 without the confounding effects of differences in absolute values, we normalized each canopy  
114 gradient to a mean value of one and the values for each quadrant were then expressed relative to  
115 the normalized mean. However, because the weather in each year of the study differed (**Table**  
116 **S2**), the normalized results for each parameter are presented separately for each year. Across the  
117 10 soybean lines, oil concentration decreased progressively from bottom to top of the canopy and  
118 was associated with a reciprocal increase in protein concentration (**Fig. 3A**). Protein and oil  
119 concentrations in soybean seeds are usually inversely related (Wilcox 1998) and this was  
120 apparent with variation within the canopy as well. Single seed weight varied with canopy  
121 position with seed produced in the middle portion tending to be slightly heavier than seeds  
122 produced at either the bottom or top of the canopy; however, the storage product gradients were  
123 independent of seed weight variation. Storage product gradients did not vary significantly across  
124 the three years of the study; however, absolute protein and oil concentrations varied among the  
125 three years of the study (**Figure S1**). This is perhaps a result of weather that varied substantially  
126 in terms of temperature and precipitation among the three growing seasons ( **Table S2**).

127 We also found that canopy position significantly affected the seed ionome, which comprises  
128 all of the minerals and trace elements found in mature seeds (**Fig. 3B**). While there have been  
129 several studies of the soybean seed ionome (McGrath & Lobell 2013; Myers et al. 2014; Sha et  
130 al. 2012; Ziegler et al. 2013), to our knowledge this is the first report demonstrating variation  
131 with canopy position. **Figure 3B** shows normalized canopy gradient plots for elements where  
132 there was a statistically significant ( $p < 0.01$ ) variation in concentration with position. Several  
133 groups of minerals exhibited common responses with canopy position. The elements Mg, Fe,  
134 Cu, Cd and Zn were present at highest concentrations in seeds from the bottom of the canopy and  
135 decreased progressively to the top of the canopy. Within this group, the profiles for Mg and Fe  
136 were similar to one another in that variation was relatively low and the gradients were almost  
137 identical across the three years; however, the relative changes in Fe concentration were much  
138 greater in magnitude compared to changes in Mg concentration. Cu, Zn and Cd showed similar  
139 patterns, but were more variable among years. The second group that was apparent included Ca  
140 and Sr, where seeds from the middle of the canopy exhibited the lowest concentrations except in

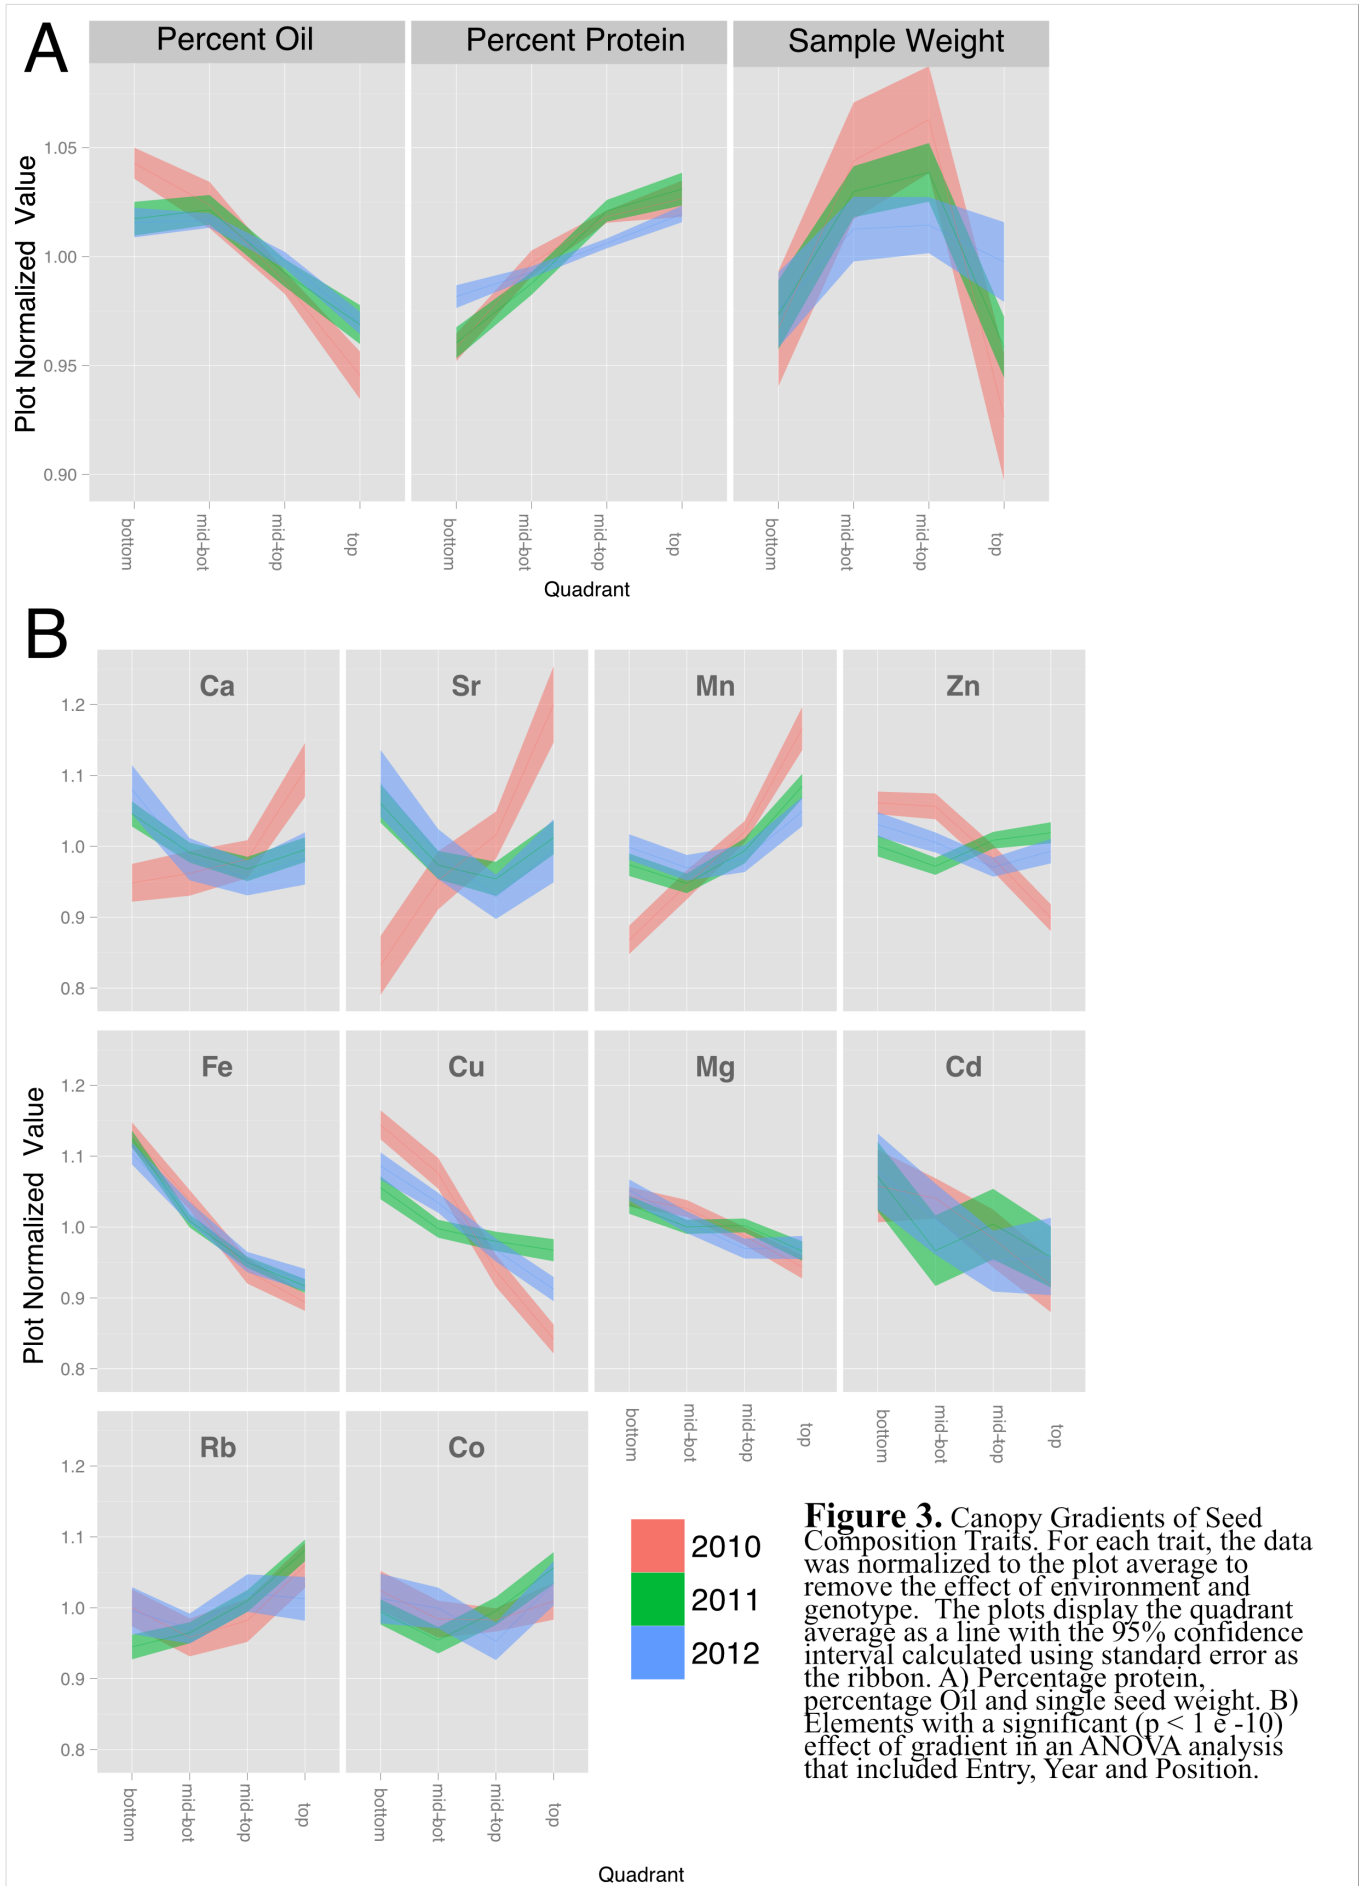



141 2010, when concentrations of both Ca and Sr tended to increase going up the canopy. Finally,  
142 Mn was alone in the third category that increased in concentration towards the top of the canopy  
143 in all 3 years. Ca and Sr, and Cd and Zn, are chemically similar which may explain their parallel  
144 profiles. It is interesting to note that while Rb is a chemical analog of K and the two are often  
145 closely correlated (Baxter 2009), that was not the case for soybean seeds where significant  
146 position effects on Rb were observed (**Fig. 3B**) but not for K (data not shown). It is also  
147 noteworthy that 2010 was the one year where mineral profiles were often distinct from those in  
148 2011 and 2012. All three years were above normal in terms of temperature, but 2010 was the  
149 only year with above normal precipitation. Thus, water availability may be a major  
150 environmental factor impacting positional effects on the seed ionome, and interestingly some  
151 minerals were affected (Ca, Mn, Cu, Zn, Sr) while others (Mg, Fe, Co, Rb, Cd) were not. We  
152 also measured other minerals (B, Na, Al, P, S, K, Ni, As, Se and Mo) that did not show  
153 statistically significant variation with nodal position and are not presented in Fig. 3. **Figure S1**  
154 shows non-normalized plots of minerals that identify differences among metals in absolute  
155 abundance. As expected, absolute concentrations of Mg, S, K, P and Ca were highest (> 1000  
156 ppm); Mn, Fe, Rb, and Zn were intermediate (10 to 100 ppm), and Na, Co, Ni, Cu, Sr, Mo, and  
157 Cd were present at trace levels (< 10 ppm).

158 Another way to compare canopy profiles for the minerals measured is to do an overall  
159 correlation matrix of quadrant variation normalized to plot averages. In this way, one can look  
160 across the entire data set for parameters that are correlated based on variation with nodal  
161 position. A strong positive correlation would indicate that both components changed not only in  
162 the same direction but also to the same relative extent. As shown in **Fig. 4A**, only a few strong  
163 correlations were apparent among the measured parameters. Variation in seed size did not  
164 significantly correlate with positional variation of any of the measured elements or storage  
165 products. Protein and oil concentrations were strongly negatively correlated, as expected. In  
166 terms of minerals and storage products, the quadrant variation in protein concentration correlated  
167 negatively with Fe and Cu, and positively with Mn. The reciprocal pattern was apparent with oil  
168 concentration. Among the minerals, highly correlated element pairs included Fe-Cu, Ca-Sr, and  
169 Zn-Cu, and between P and S, Zn, and Co. As noted earlier, Ca and Sr are chemical analogs and  
170 frequently correlated (Baxter 2009), but surprisingly, other chemical analog pairs such as K-Rb  
171 were not observed. Fe and Cu were positively paired and have been reported to be positively

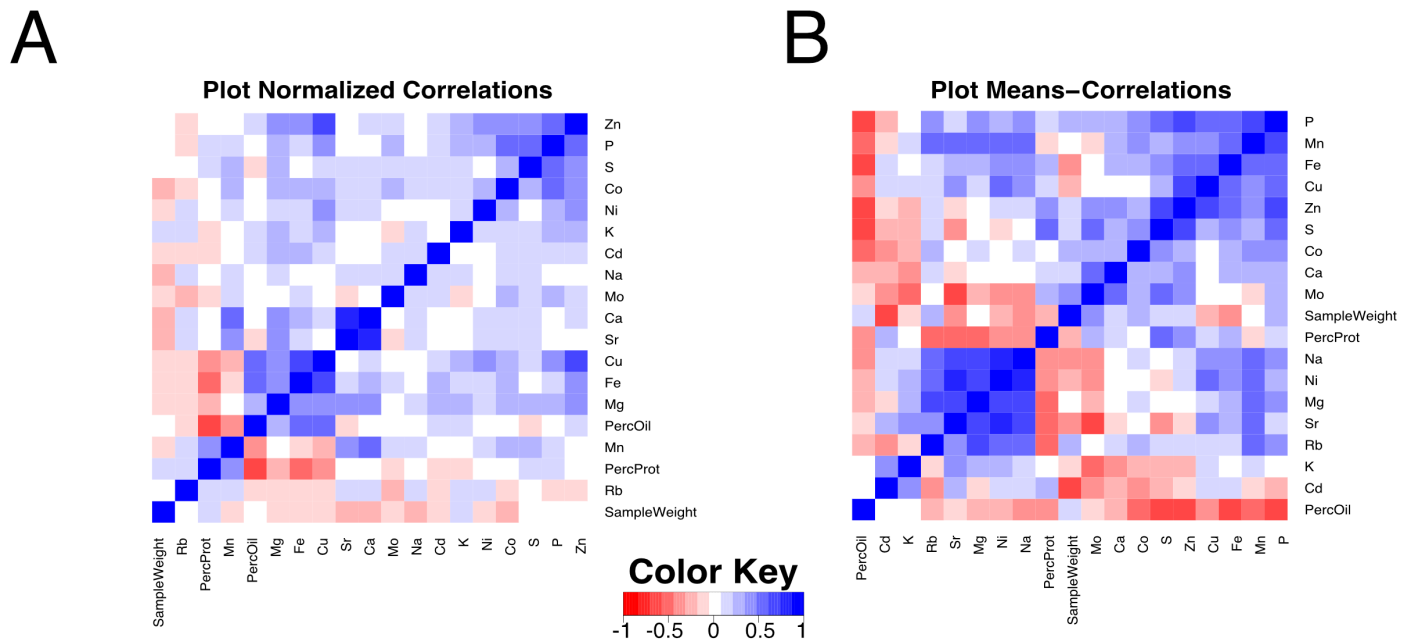

**Figure 4.** Correlation Plot among Composition Traits. Pearson correlation values between compositional traits. **A)** Correlation across 832 quadrants normalized to the plot average. **B)** Correlation across 208 plot means.

172 correlated in soybean seeds (Vasconcelos et al. 2014) but the basis for the pairing is unknown.  
173 Correlations between P and minerals are often considered to reflect association of the mineral  
174 with seed phytate, the principal form of P in seeds (Vreugdenhil et al. 2004).

175 In addition to comparing parameters based on quadrant variation, it is also worthwhile to  
176 compare plot averages, which will reflect genetic and environmental effects on absolute values  
177 of the parameters. **Figure 4B** shows a dynamic matrix plot of correlations between plot means.  
178 Compared to the corresponding plot that focused on quadrant variation (**Fig. 4A**), many more  
179 strong correlations were apparent when comparing plot means. For example, protein  
180 concentration was positively correlated with S and Zn (and more weakly with Fe). The  
181 correlation with S is expected as the total seed S has been shown to track closely with high  
182 cysteine- and methionine- containing proteins in the soybean seed (Krishnan et al. 2012). The  
183 correlations between protein content, Zn and Fe could be due to their primary role as cofactors of  
184 metalloproteins. Accordingly, there was a significant negative correlation of Fe, S, and Zn with  
185 oil concentration. Interestingly, there was also a strongly significant negative correlation of P  
186 with oil, whereas the positive correlation of P with protein concentration was relatively weak.  
187 The majority of mineral correlations were positive in nature, with a maxi-cluster of Rb, Mn, Sr,  
188 Mg, Ni, and Na and a mini-cluster of Fe, Cu and Zn. The mini-cluster pairs of Fe-Cu and Cu-Zn  
189 were noted in the plot of **Fig. 4A**, but several members of the maxi-cluster correlation were not  
190 reported in the plot normalized correlation matrix. For example, Mn and Mg concentrations did  
191 not relate to each other in terms of quadrant variation but were strongly positively correlated  
192 based on plot means, indicating that mineral uptake and allocation among seeds in different  
193 quadrants are controlled separately. Finally, P concentration exhibited a positive correlation with  
194 Mn, Fe, Cu, Zn, S and Co. The link among P and Zn, S and Co concentrations with quadrant  
195 variation was observed (**Fig. 4A**), but when analyzed in terms of plot means in **Fig. 4B** the  
196 association of P with Mn, Fe, and Cu became apparent as well. It is worth noting that in terms of  
197 plot means, there was no association between Ca and Sr suggesting that these chemical analogs  
198 do not always behave similarly. There was one also a strong negative correlation between Mo  
199 and Sr, perhaps suggesting a common component(s) of the uptake system.

## 200 **Canopy microenvironment impacts seed composition**

201 Our understanding of the environmental factors responsible for the positional effects on seed  
202 composition is limited; however, many microclimatic factors vary from the top to the bottom of

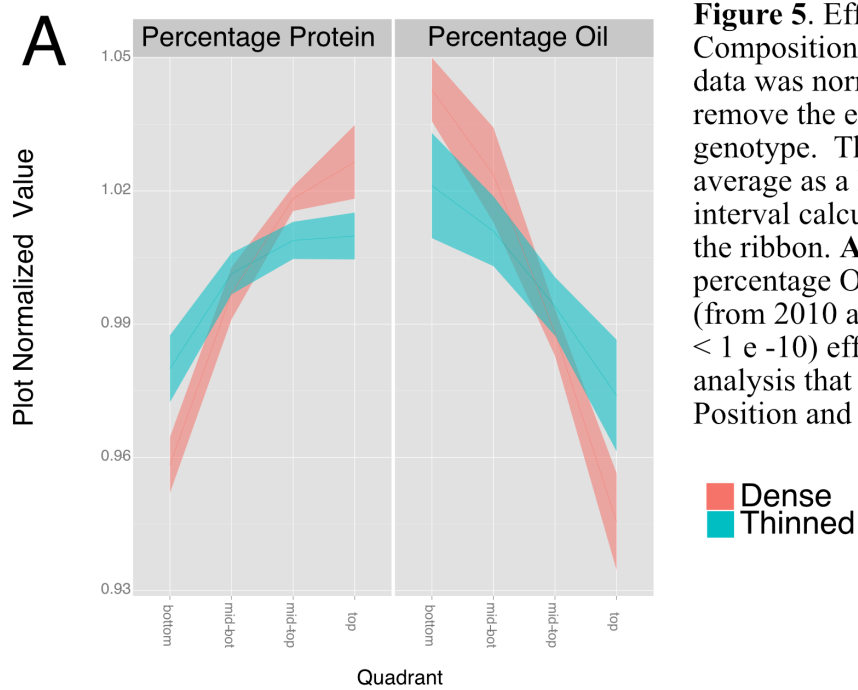

**Figure 5.** Effect of Thinning on Compositional Traits. For each trait, the data was normalized to the plot average to remove the effect of environment and genotype. The plots display the quadrant average as a line with the 95% confidence interval calculated using standard error as the ribbon. **A)** Percentage protein and percentage Oil in 2010. **B)** Elements (from 2010 and 2012) with a significant ( $p < 1 e -10$ ) effect of gradient in an ANOVA analysis that included Entry, Year, Position and thinning.

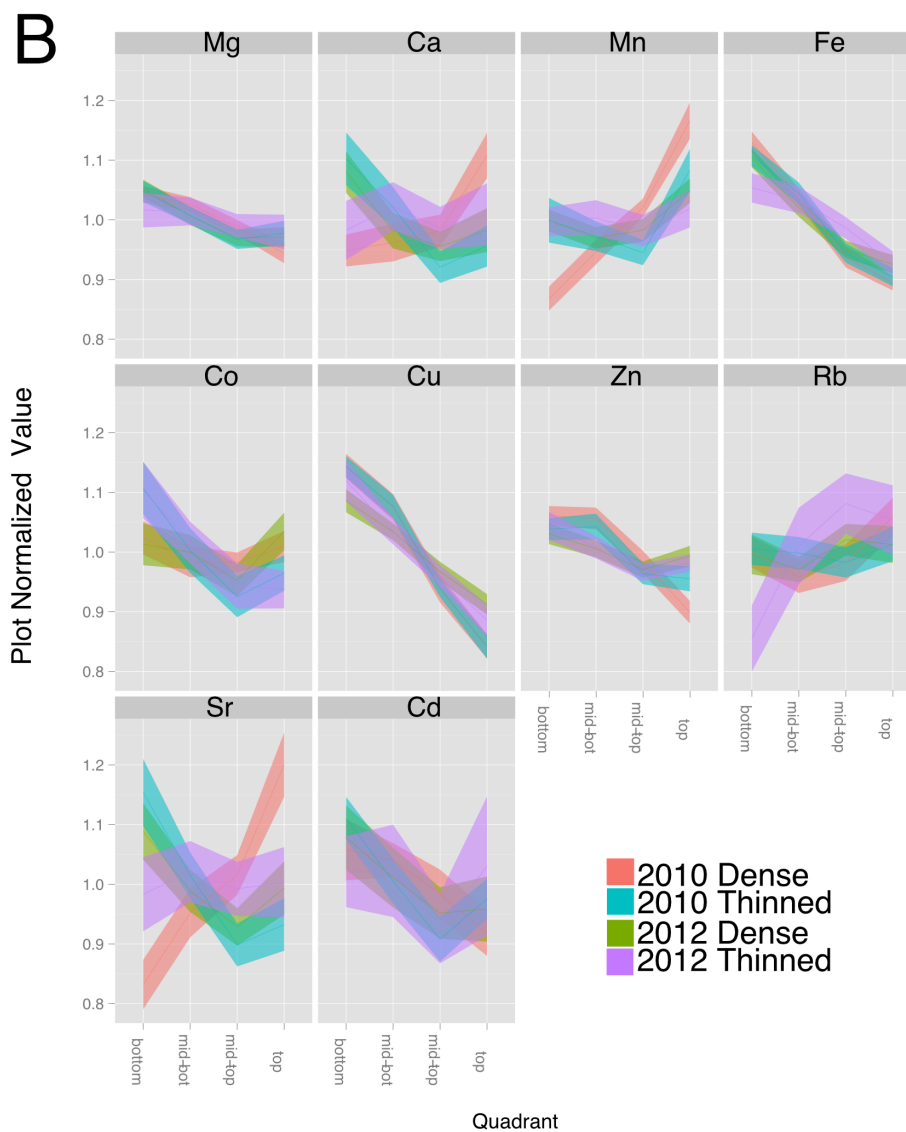

203 the closed soybean canopy (Baldocchi et al. 1983). Environment is well known to impact  
204 soybean seed protein and oil composition (Rotundo & Westgate 2009). Therefore, we conducted  
205 experiments to evaluate microclimatic differences within the canopy by thinning plants at  
206 flowering to remove the influence of neighboring plants. Removal of neighboring plants  
207 increased protein concentration at the expense of oil in seeds throughout the canopy of the  
208 spaced plants but the changes were greatest in pods lower on the main stem. As a result, the  
209 thinning treatment reduced the positional effect on protein and oil by 50-60% (**Fig. 5A**).  
210 Increased light energy to drive photosynthesis at most leaf positions and increased temperature at  
211 lower positions could both favor increased protein accumulation at lower nodes thereby reducing  
212 the difference between top and bottom seeds; however, while thinning significantly altered the  
213 main stem gradients in major storage products there was relatively little effect on minerals. As  
214 shown in **Fig. 5B**, the canopy positional effect on Mg, Fe and Cu was unaltered by the thinning  
215 treatment whereas Ca and Sr were similar to one another and showed a significant effect of  
216 thinning but only in one of the two test years (2010). The general conclusion is that thinning  
217 affects the canopy positional effect on some but not all minerals. This suggests that at least for  
218 Mg, Fe and Cu, the transport and homeostasis mechanisms are generally independent of  
219 instantaneous environmental factors and the transport of sucrose and amino acids into the  
220 developing seeds is not the sole factor driving their movement into seeds.

221

## 222 **Seed fill period and seed composition**

223 Another factor that could contribute to canopy position effects on seed composition is the  
224 duration of the seed-fill period (SFP), which is affected by genetic and environmental factors and  
225 is one of the major determinants of yield potential in soybean (Evans et al. 1995). Soybeans  
226 flower in response to photoperiod and the first flowers form lower in the canopy followed by  
227 flowering at upper nodes. Pods then form in the same order and when fully elongated the  
228 process of seed development is considered to begin when seeds are approximately 0.34  
229 centimeter long (by visual inspection). In general, seeds lower in the canopy fill over a longer  
230 period but at a lower rate compared to seeds at the top of the canopy (Raboy & Dickinson 1987)  
231 so that at maturity, final seed size tends to be rather constant through the canopy rather than  
232 increasing progressively from bottom to top of the canopy. We measured the SFPs with our core  
233 group of ten lines and found substantial differences in SFPs at the bottom and top of the canopy

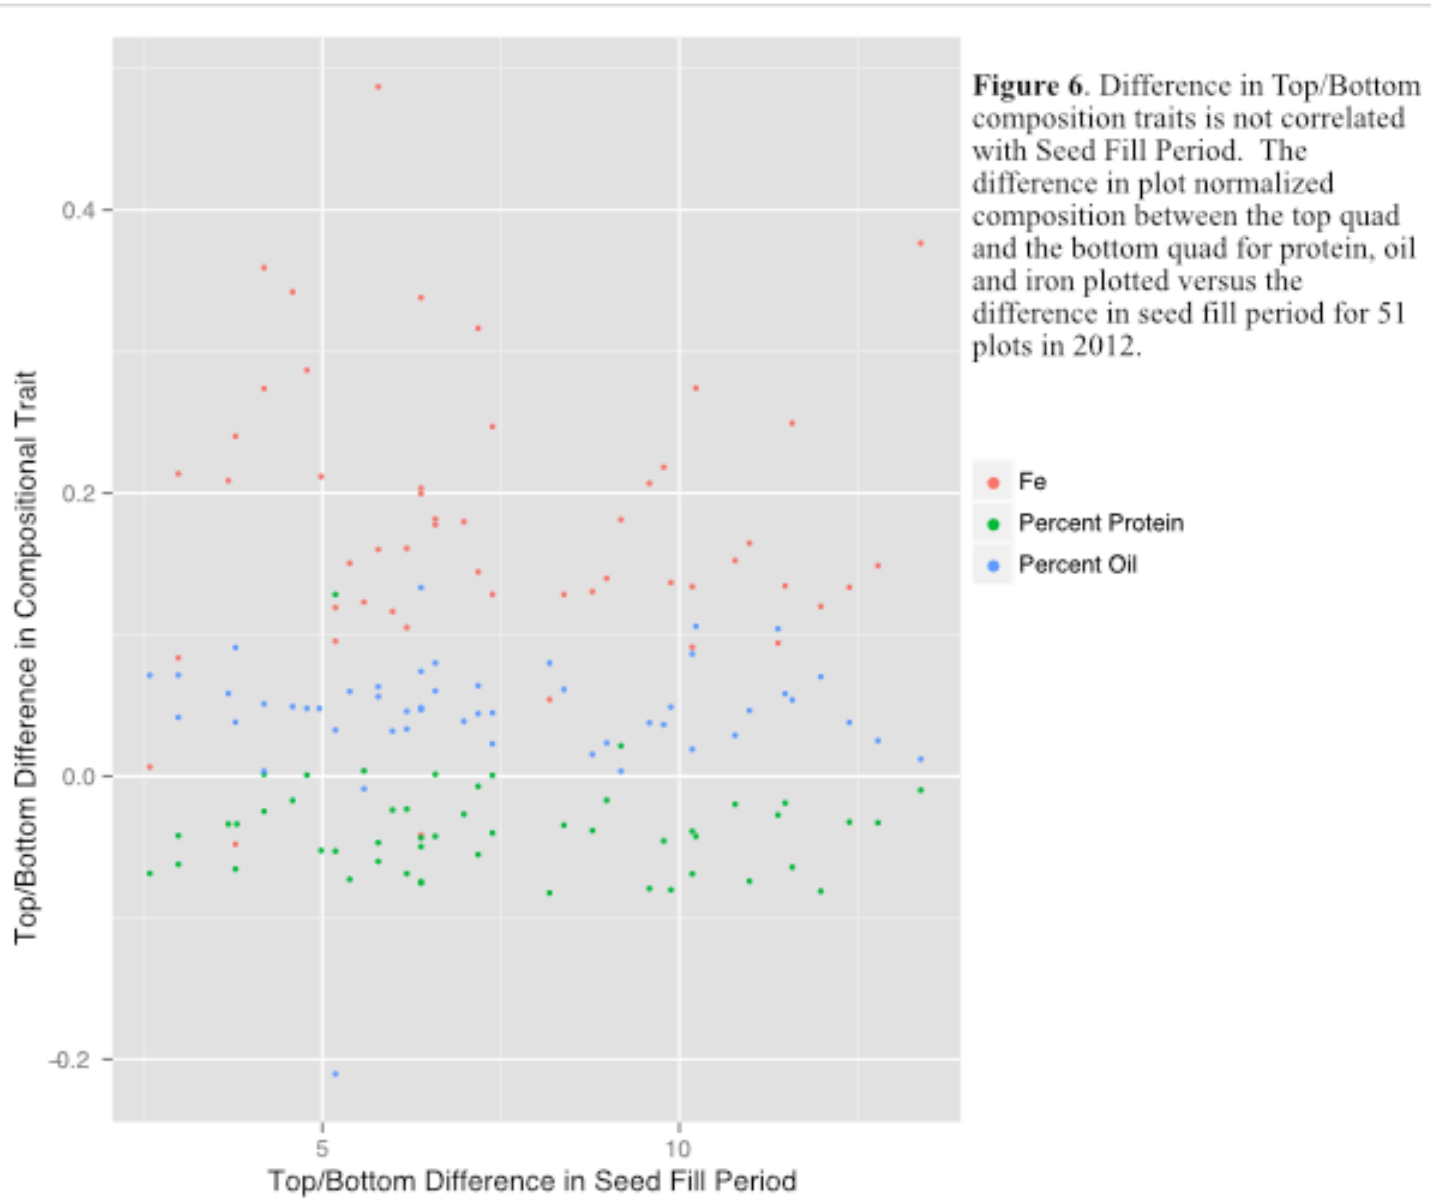

234 (Table S3). Top SFP was generally correlated with bottom SFP, as would be expected, but the  
235 difference in SPF (bottom – top position) was not correlated with the canopy gradients of  
236 protein, oil, or Fe (Fig. 6). Therefore, factors other than the duration of the SFP are responsible  
237 for the documented variation in composition with nodal position.

238

### 239 **Iron concentrations of soybean seed products**

240 Our results raise the question of whether soy food products made from seed from different  
241 portions of the canopy would vary in terms of their mineral concentrations. Three of the most  
242 common and simplest products to make from soybean seeds are flour, milk and okara (the  
243 particulate material remaining after preparation of milk). Because Fe is one of the most critical  
244 minerals to human health and anemia is a global epidemic, we focused our initial analysis on the  
245 Fe content of these soy food products. We prepared flour from seven lines, and milk and okara  
246 from four lines and Fig. 7 summarizes the results. With all three products, the concentration of  
247 Fe was highest in products made from seeds produced at the bottom of the canopy and decreased  
248 progressively with canopy position of the seeds used. Thus, as would be expected the  
249 concentration of seed Fe affects the concentration of Fe in the flour, milk or okara produced from  
250 those seeds. Although many questions remain, the public health implications of our findings are  
251 apparent. Given that mineral content of seeds, especially Fe, is important our results uncover  
252 another source of variation that can be directly exploited.

253

### 254 **The vegetative soybean ionome**

255 The canopy effect on seed mineral concentration prompted us to look at the distribution of  
256 minerals in the shoots of vegetative plants. Minerals deposited in seeds are derived from  
257 continued uptake from the soil or remobilization of previously accumulated minerals (Hocking &  
258 Pate 1977; Waters & Grusak 2008), and therefore the leaf ionome of the vegetative plant is  
259 relevant to studies of the mature seed ionome. Preliminary studies of the distribution of Fe in  
260 stems, petioles and leaves of ‘Cumberland’ soybean plants indicated that the majority of Fe was  
261 stored in leaves (data not shown). Consequently, we examined the leaf ionome as a function of  
262 canopy position. As shown in Fig. 8, the concentrations of Mg, Al, Ca, Mn, Fe, Co, As, Se and  
263 Sr were highest in leaves at the bottom of the canopy and decreased progressively to the top of  
264 the canopy. Concentrations of P, S, K, Cu, Zn, Rb, and Mo increased from bottom to top leaves.

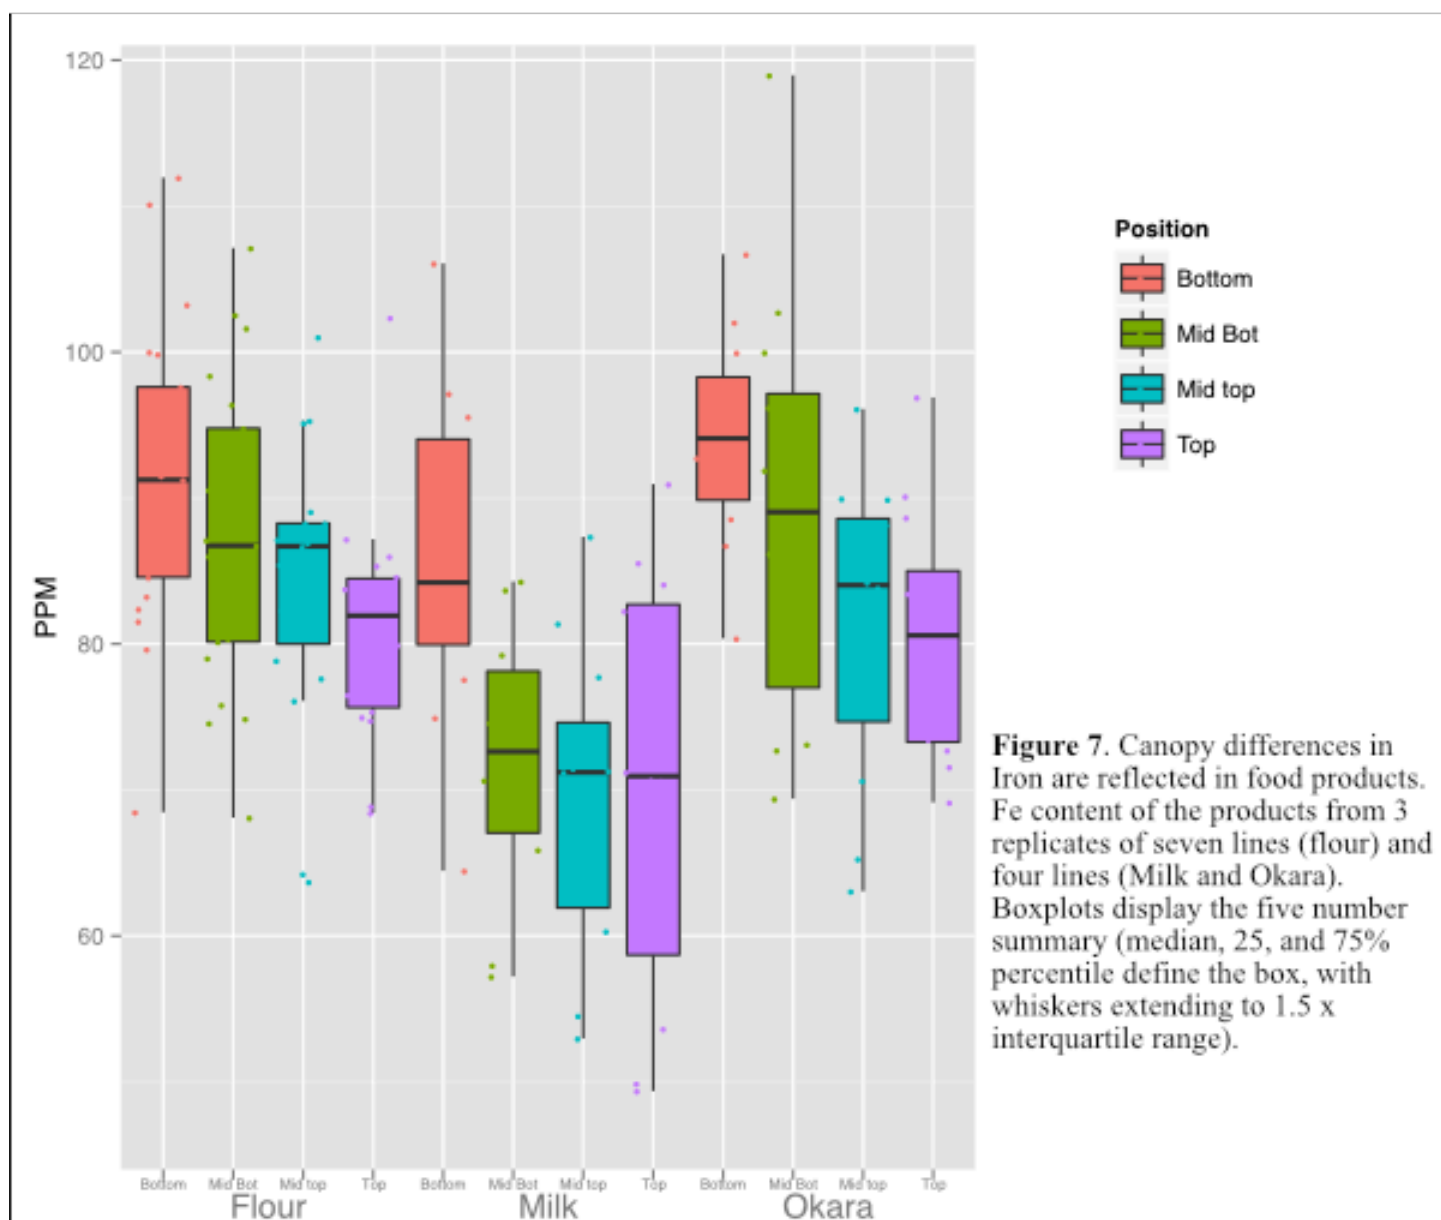



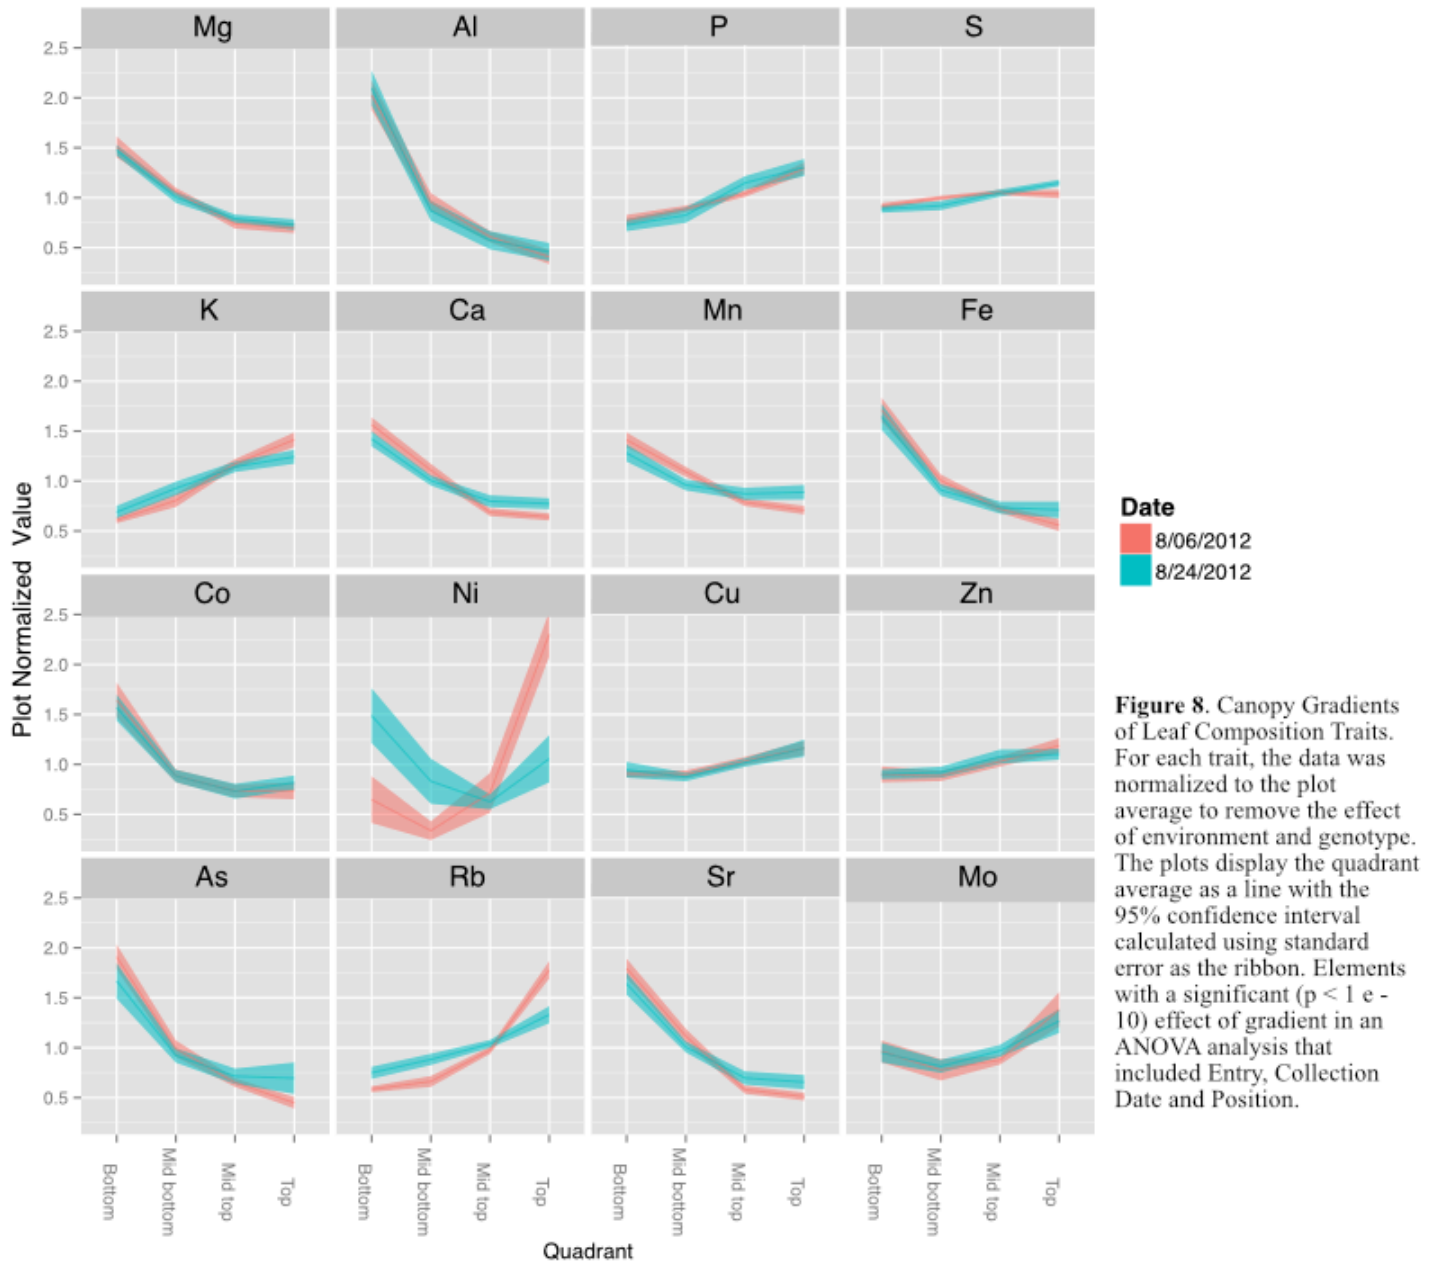

265 Na and Ni were both present at low absolute concentrations and fluctuated but not in a  
266 progressive pattern as for the other minerals. Although leaves at different positions are often  
267 analyzed together (or as part of the ‘shoot’), two previous studies with soybean also reported  
268 differences in mineral concentrations of lower, middle and upper leaves (Drossopoulos et al.  
269 1994) or young and old leaves (corresponding to different node positions) (Duke et al. 2012) that  
270 are generally consistent with our results. The basis for differential accumulation of foliar  
271 minerals at different positions within the canopy is not clear and will be important to address in  
272 future studies. One possible explanation is that the greater phloem mobility of P and K facilitates  
273 their enhanced remobilization to upper nodes whereas other less mobile elements (e.g. Fe, Ca,  
274 and Mg) tend to remain at their point of initial deposition. This would not readily explain the  
275 observed profiles for Cu, Zn and Mo, however, highlighting the complexities involved in metal  
276 homeostasis and the significant variation with canopy position. Another working hypothesis  
277 could be that K, P, Cu, Zn and Mo are mineral markers of metabolic activity and accumulate in  
278 leaves at the top of the canopy that have highest rates of photosynthesis. Because minerals can be  
279 remobilized from leaves to developing seeds (Drossopoulos et al. 1994; Jiménez et al. 1996;  
280 Sankaran & Grusak 2014), it is tempting to speculate that canopy seed gradient in Fe and Mg  
281 may be related to greater stores of both metals in leaves lower in the canopy. Opposite patterns  
282 were observed for other minerals (Ca, Mn, K, and Cu) suggesting that remobilization is either  
283 mineral specific or not quantitatively important in delivery of minerals to developing seeds.  
284 A final point to note is that the potential exists for some soil particles to adhere to vegetative  
285 plant parts, especially lower in the canopy, while seeds are protected from soil contamination by  
286 the pods. Since some minerals exhibited opposite patterns, it seems that soil adhesion could not  
287 be completely responsible for the patterns observed.

288

## 289 **Node position and the developing seed metabolome**

290 Developing seeds were analyzed to determine whether canopy position affected seed metabolism  
291 sufficiently to explain the observed differences in protein and oil concentrations at maturity. To  
292 do this, we collected developing seeds from the top and bottom of the canopy at several time  
293 points over a 24-h period as illustrated in **Figure S2**. Because seeds at the top and bottom of the  
294 canopy differed in size on the day of the experiment, seeds from the top of the canopy were also  
295 collected 6 days later when they had reached the same size (fresh weight seed<sup>-1</sup>) as the bottom

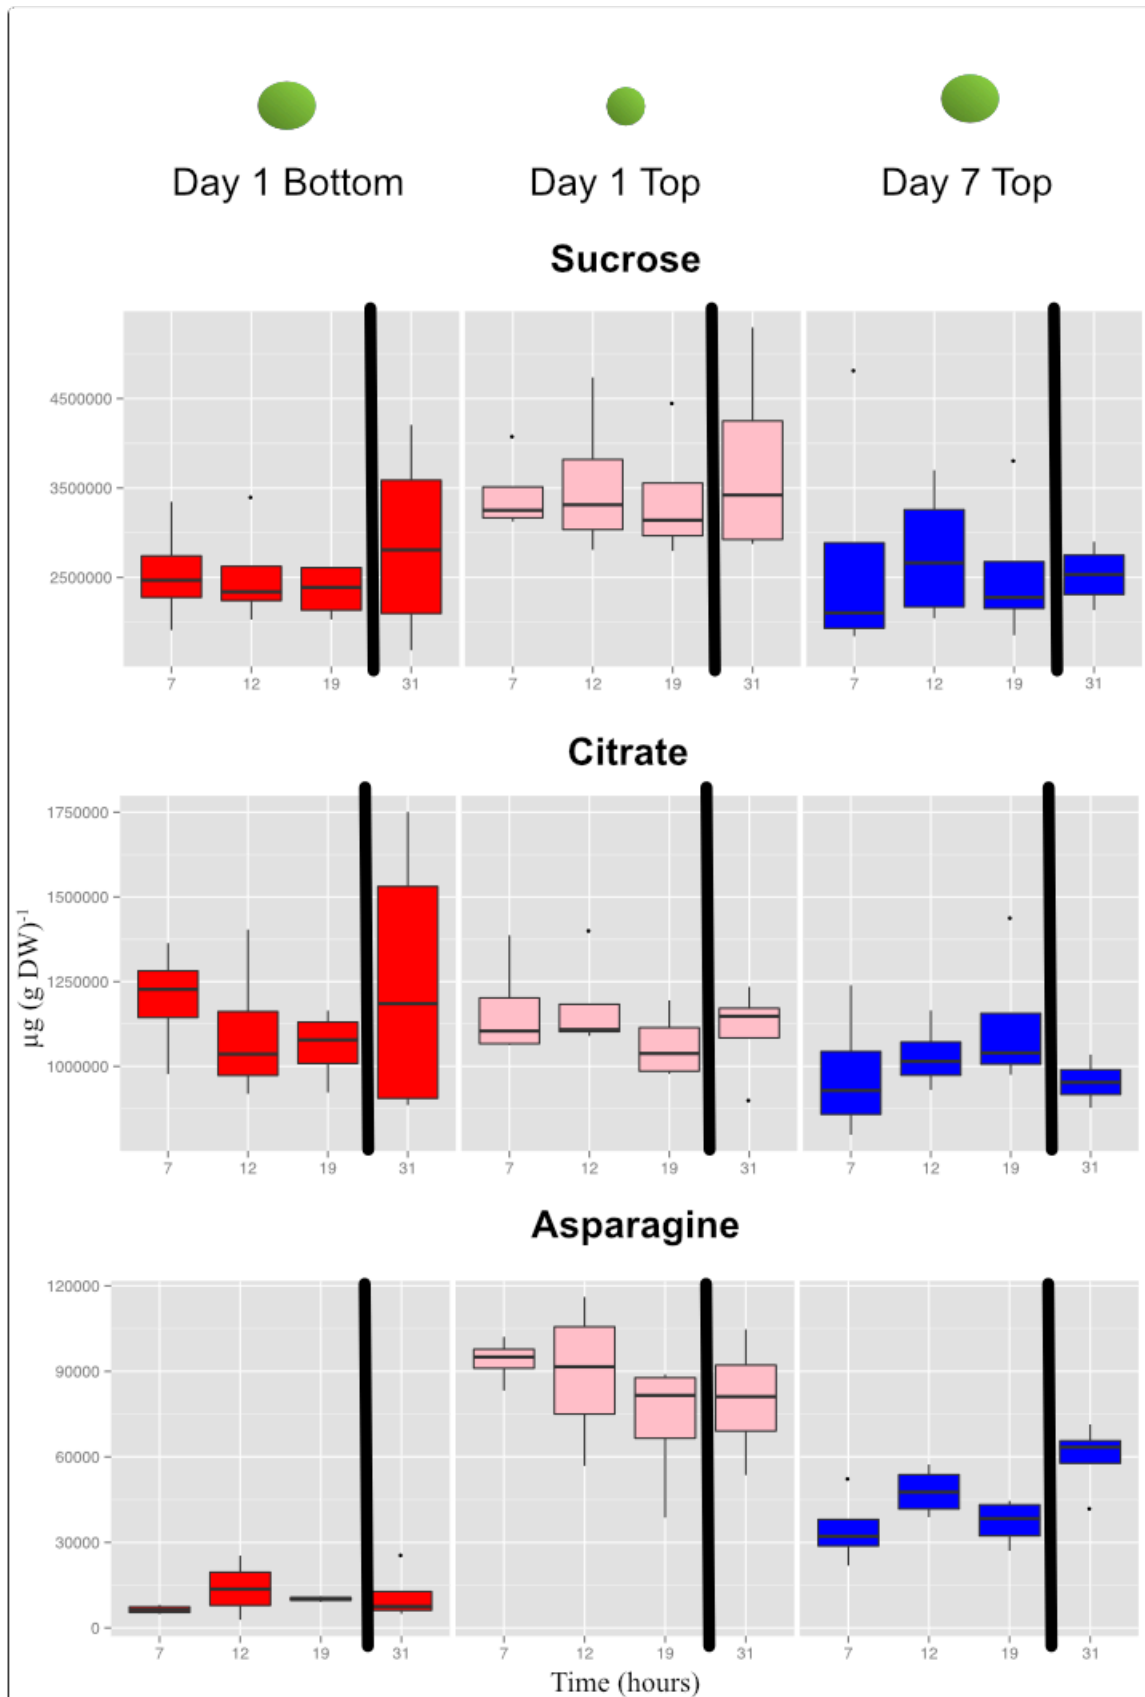

**Figure 9.** Concentrations of selected primary metabolites in developing seeds. **A**, Suc; **B**, citrate; and **C**, Asn. Boxplots display the five number summary (median, 25, and 75% percentile define the box, with whiskers extending to 1.5 x interquartile range) for three replicates at each sampling time: 7AM (7), 12N (12), 7PM (19) and the following morning at 7AM (31). The black vertical bars represent the intervening night period. Values are  $\mu\text{g (g DW)}^{-1}$ .

296 seeds on the first collection date. All seeds were at the stage of development where cell  
297 expansion and accumulation of storage compounds (protein and oil) were the dominant  
298 metabolic processes (Collakova et al. 2013). Untargeted metabolite profiling was conducted for  
299 analysis of polar compounds, free amino acids, free fatty acids, and total fatty acids (**Fig. S3**).

300 In general, most metabolites did not show diurnal changes in concentration, but there were  
301 differences in concentrations as a function of seed size and node position. The metabolite plots in  
302 **Fig. 9** illustrate some of the different patterns observed. The concentration of sucrose (**Fig. 9A**)  
303 in developing seeds did not vary diurnally and remained relatively constant but the concentration  
304 was slightly higher in the smallest seeds (day 1, top seed) compared to the larger seeds sampled  
305 at the bottom position on day 1 or top position on day 7. The decrease in sucrose concentration  
306 comparing top seed on day 1 and day 7 likely reflects in part the dilution effect caused by storage  
307 product accumulation as the seeds increased in size by roughly 2-fold. In contrast, the  
308 concentration of citrate in developing seeds was roughly equal among the three samples (**Fig.**  
309 **9B**). These results suggest that seeds actually accumulate sucrose and to a larger extent citrate as  
310 they increase in dry matter during seed fill (thereby negating the dilution effect caused by seed  
311 growth). This also indicates that developing seeds have ample sugars and organic acids  
312 irrespective of size and node position and time of day. In marked contrast to sucrose and citrate  
313 were the dramatic differences observed in free asparagine (Asn) concentration (**Fig. 9C**), which  
314 was highest in top seed sampled on day 1 (Aug 20), and lowest in bottom seed sampled on the  
315 same day; the difference was roughly 8-fold. Sampling top seed on day 7 (Aug 26), when seed  
316 size was equivalent to that of bottom seed on day 1, still resulted in a ~4-fold elevation of free  
317 Asn concentration. The roughly 2-fold decrease in Asn concentration in seeds at the top of the  
318 canopy from day 1 to day 7 likely reflects the dilution effect of growth. The pattern for Asn  
319 concentration is potentially of interest because free Asn concentration during seed development  
320 correlates with protein concentration at maturity (Herman 2014b; Hernandez-Sebastia et al.  
321 2005; Miller et al. 2008; Pandurangan et al. 2012). The results obtained in the present study  
322 suggest that greater supply of Asn to developing seeds at the top of the canopy may contribute to  
323 the observed greater accumulation of storage protein.

324 Importantly, Asn was also one of the important metabolites that distinguished the three sets  
325 of seeds collected based on a global metabolite analysis (**Fig. S4**). Mean values for Asn, and  
326 other protein amino acids are shown in **Fig. 10**. The concentrations of the free amino acids was

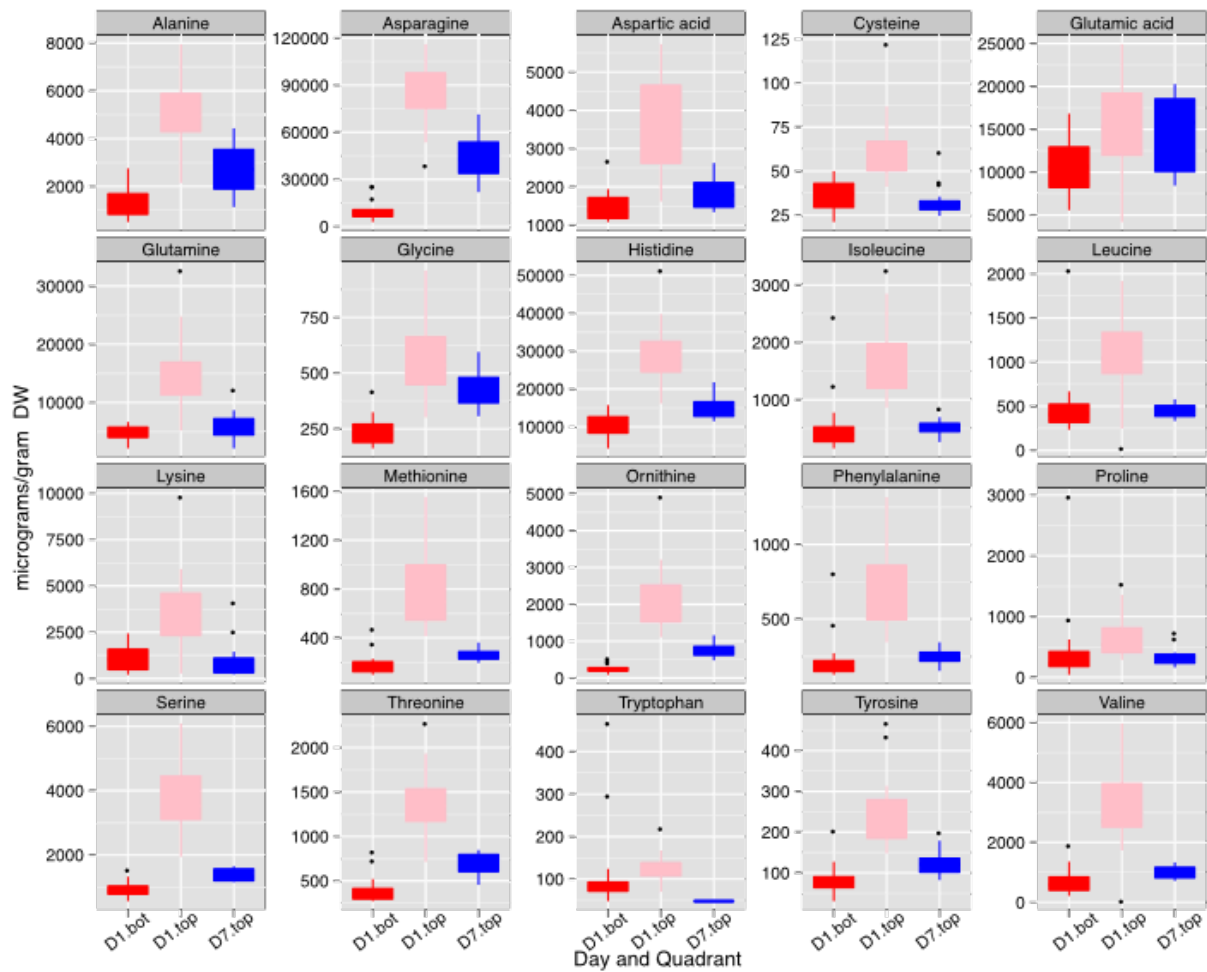

**Figure 10.** Concentrations of free amino acids in developing seeds. Boxplots display the five number summary (median, 25, and 75% percentile define the box, with whiskers extending to 1.5 x interquartile range) for values from each sampling interval (3 replicates and 4 time points are merged within each box) and nodal position. Ornithine levels reflect both ornithine and arginine as arginine is converted to ornithine during sample prep for GC-MS. D1.bot, D1.top and D7.top refer to the samples collected on day one top and bottom quadrants and the day seven top quadrant respectively.

327 highest in the small seed (top seed, day 1). Concentrations of Ala, Asn, Gly, and Thr were  
328 substantially higher in top seed at day 7 relative to bottom seed at day 1 (when seed sizes were  
329 similar). Of those amino acids, Asn was present at the highest absolute concentrations and may  
330 contribute to the storage protein biosynthesis either by acting as a signal metabolite or providing  
331 substrate for protein biosynthesis.

332

333

## 334 **Discussion**

335 The present study yields two major conclusions. First, the position along the main stem at which  
336 soybean seeds develop has a profound impact on seed composition, affecting the concentrations  
337 of protein, oil and certain minerals at maturity. Second, the canopy position effects on seed  
338 mineral concentrations (in particular Fe) are sufficiently large that there may be direct  
339 implications for human nutrition in countries where plants are the main source of protein and  
340 soybeans are used for human food. These conclusions are discussed in more detail below.

341

### 342 **Positional effects on seed protein and oil concentration are broadly observed**

343 Results of the present study demonstrate that for 10 lines grown over a period of 3 years there  
344 were remarkably consistent gradients in protein and oil concentrations in mature seeds as a  
345 function of nodal position (**Figs. 2A and 3**). Increased concentration of oil in seeds from lower  
346 nodes could result from the increased duration of the SFP documented for lower pods (**Table S3**)  
347 because the accumulation of oil in seeds often starts earlier than protein (Rotundo & Westgate  
348 2009; Saldivar et al. 2011). However, oil accumulation tends to plateau before protein  
349 accumulation and therefore, percent oil will often decrease with increasing duration of the SFP  
350 rather than increase. In the present study, the protein and oil concentration gradients from  
351 bottom to top of the canopy were not correlated with the difference in SFP between the two  
352 positions (**Fig. 6**) and thus it appears that SFP does determine the observed gradients in protein  
353 and oil concentration. Micro-environment appears to be a factor controlling protein and oil  
354 concentration gradients in the canopy because removal of neighboring plants at flowering  
355 increased protein concentration at all positions and decreased the difference between top and  
356 bottom nodes (**Fig. 5**). While it is not clear which micro-environmental factor(s) might actually  
357 be involved, we suggest that increased light energy reaching lower leaves may be a contributing

358 factor. Metabolomic analysis of developing seeds that identified free Asn as one of the primary  
359 metabolites distinguishing seeds at the bottom and top of the canopy supports this conclusion.  
360 Asparagine is the major free amino acid in developing soybean seeds and differences in Asn  
361 concentration during development are positively correlated with protein concentration at seed  
362 maturity (Hernandez-Sebastia et al. 2005; Pandurangan et al. 2012). Furthermore, over-  
363 expression of asparaginase in soybean, driven by an embryo-specific promoter, resulted in a  
364 reduction in free Asn concentration during development and reduced protein concentration in  
365 mature seed, measured by nitrogen analysis (Pandurangan et al. 2015). Collectively, these results  
366 suggest that free Asn is a sensor or regulator of processes that determine protein accumulation in  
367 soybean seeds (Herman 2014a). Our results are consistent with this hypothesis and suggest that  
368 differences in free Asn concentration may explain the position effects on seed protein (and oil)  
369 concentration. Nitrogen and carbon flux into pods is largely provided by nearest sources  
370 (Sedigh & Jolliff 1986; Streeter & Jeffers 1979) including the nearest trifoliolate leaves. We  
371 speculate that decreased light at lower positions in the closed canopy (i.e., with neighboring  
372 plants) would reduce leaf metabolism as well as the xylem flux of ureides and/or nitrate from  
373 roots to the lower leaves, thereby restricting the ability of those leaves to provide Asn (and Gln)  
374 to developing seeds. In contrast, removal of neighboring plants (in the ‘thinned’ plant treatment)  
375 would increase light at lower nodes thereby enhancing overall leaf metabolism and the flux of  
376 reduced nitrogen to subtending pods resulting in increased protein (and reduced oil)  
377 accumulation.

378

### 379 **Positional effects on seed mineral concentration are documented**

380 The concentration of minerals in seeds reflects the combined action of transport processes and  
381 regulation at multiple steps starting with mobilization from the soil, uptake into the root, and  
382 transport to the shoot for distribution among organs (Grusak et al. 1999; Waters & Grusak 2008).  
383 Deposition of some minerals in seeds can also involve remobilization from leaves during seed  
384 filling (Grusak et al. 1999; Hocking & Pate 1977), and it is interesting that different minerals  
385 show fundamentally different profiles of accumulation in seeds as a function of canopy position  
386 (**Fig. 3**). These differences could reflect alternate routes from the apoplast to the symplast or  
387 differences in mobility in the phloem. Interestingly, minerals that tended to have highest  
388 concentrations in seeds at the bottom of the canopy (e.g., Mg, Fe, and Cu) are considered to have

389 better phloem mobility compared to the minerals that tended to concentrate in the top of the  
390 canopy (e.g. Mn and in some cases Ca) that are considered to have poor phloem mobility. These  
391 results suggest that remobilization from leaves may be playing some role at least in the positional  
392 effects on the mature seed ionome.

393 While multiple seed constituents exhibited canopy concentration gradients, it seems  
394 unlikely that they are all caused by the same factors. Changing the microenvironment altered the  
395 protein and oil gradients but did not affect observed gradients for most of the minerals (**Fig. 5**).  
396 Furthermore, while the slope of many gradients changes across lines, treatment and year, the way  
397 that they change is not well correlated between the different constituents, as illustrated in the plot  
398 normalized correlation matrix (**Fig. 4A**), where relatively few strong correlations among the  
399 various parameters were apparent. However, numerous correlations were apparent when mean  
400 plot values were compared (**Fig. 4B**). Several minerals (e.g., P, Mn, Fe, Zn, S, and Co) had a  
401 negative relationship with oil concentration and increased with protein concentration. Thus,  
402 some coordination between seed storage product accumulation and mineral uptake into seeds is  
403 evident. However, the results suggest that total uptake of a mineral and the allocation among  
404 nodal positions are controlled by different mechanisms, and in general, canopy positional effects  
405 on minerals and protein/oil appear to be controlled by distinct mechanisms. Future studies will  
406 be required to sort out the mechanisms involved.

407

#### 408 **Human nutrition implications for variation in seed composition**

409 Soybeans are valued for their protein and oil content, but when used for human nutrition the  
410 content of minerals such as iron and zinc is also critically important. On a global scale, human  
411 iron deficiency is one of the most prevalent nutritional disorders (McLean et al. 2009) especially  
412 in countries where plant-based diets are prominent. As discussed above, nodal position affected  
413 the concentration of several minerals such as Mg, Fe, and Cu that were present at higher  
414 concentrations in seeds produced at the bottom of the canopy. Iron is of particular interest and  
415 was generally 20% higher in seeds produced lower in the canopy relative to the top and as  
416 expected, differences in seed iron concentrations affected the concentration of iron in soy food  
417 products made from those seeds (**Fig. 7**). Soy flour preserved more Fe than did milk/okara.  
418 Perhaps mineral retention improvement through product preparation is possible. An immediate  
419 application of our results with respect to human nutrition would be to use seeds from the top and



420 bottom halves of the canopy for different purposes, with seeds produced in the lower half  
421 reserved for production of iron-rich soy foods for human consumption. Thus, knowledge of  
422 these canopy position effects provides an unexpected approach to link agronomic practices to  
423 improve human nutrition and health.

424

### 425 **New type of seed heteromorphism and implications for climate change impacts**

426 Seed heteromorphism is well established (Matilla et al. 2005) but the seed heterogeneity  
427 documented here establishes a new category where an individual plant produces a continuum of  
428 seeds that differ in major aspects of their composition (protein, oil, and minerals) but are  
429 morphologically very similar. Overall, our results raise a number of questions and directions for  
430 future research. For example, it would be interesting to explore whether there are positional  
431 effects on soybean seed functional traits such as seed vigor or seedling stress tolerance. Because  
432 environment during reproductive development of plants is now recognized to broadly impact  
433 seed properties, such as growth performance and stress tolerance of the progeny (Biodner et al.  
434 2007; Tricker et al. 2013), it will be interesting to further explore similar properties of soybean  
435 seed produced at the different parts of the canopy. Our results also raise the question of whether  
436 similar effects occur in other species including non-domesticated plants where there might be  
437 some ecological significance.

438 Another area that will be interesting to explore is the impact of elevated CO<sub>2</sub> on the  
439 canopy positional effects described in the present study. It was recently reported (Loladze 2014;  
440 Myers et al. 2014) that grain from many species, including soybean, have lower concentrations  
441 of Zn and Fe when plants are grown at elevated CO<sub>2</sub> thereby uncovering a new climate change  
442 challenge to global health. The meta-analysis established a ~5% reduction in soybean seed Fe  
443 and Zn concentrations at high CO<sub>2</sub>. It is relevant to note that variation in seed Fe concentration  
444 with node position established in the present study is substantially larger (4-fold greater)  
445 compared to the impact of climate change on mean seed Fe concentration. Therefore, our results  
446 are likely to be meaningful from a quantitative standpoint and have important implications for  
447 examining the impact of climate change on the seed ionome. For example, it will be interesting  
448 to determine how this overall reduction in mean seed Fe concentration at elevated CO<sub>2</sub> is related  
449 (if at all) to canopy position effects; is Fe reduced 5% in seeds at nodes throughout the canopy  
450 or are certain positions affected to a greater degree than others? Identifying the molecular

451 mechanisms underlying canopy gradients in composition may provide new approaches to  
452 controlling soybean seed quality for various uses, including food for human consumption under  
453 conditions of global climate change.

454

## 455 **Materials and Methods**

### 456 **Plant growth and sampling**

457 Soybean lines were grown at the University of Illinois South Farm, Urbana, IL, in a  
458 randomized complete block design with three replicates each year. Each plot consisted of three  
459 rows 2.5 m long, with 0.75 m between rows and a planting density of roughly 30 seeds m<sup>-1</sup>.  
460 To produce the thinning treatment, all but three plants were removed from each row shortly after  
461 flowering. Delaying thinning until after the reproductive period had begun minimized branching  
462 on the remaining plants. Approximately 20 cm of plants were thinned from the ends of each row  
463 and the third plant was left in the middle in the row. The remaining plants were spaced  
464 approximately 1 m apart.

465 Plants were harvested at maturity. All plants were cut close to ground level and brought  
466 into the laboratory. Each stem was divided into four quadrants and the stem fractions in each  
467 quadrant were threshed together for each plot. Only normal-sized plants were included in the  
468 analysis, and extremely small, wrinkled or off-color seeds were manually removed from all  
469 samples before analysis.

470

### 471 **Soy products**

472 To produce flour, soybeans were blanched (boiled for ~25 minutes) and then baked  
473 before grinding. To produce soymilk and okara (remaining solids), soybeans were blanched  
474 (boiled for ~5 min) twice and then ground in water and cooled slightly. The soymilk (liquid  
475 phase) and okara (solid phase) were separated using a cheesecloth and then dried separately and  
476 reground before analysis.

### 477 **Seed storage product analysis**

478 Protein and oil were measured with an Infratech 1241 Grain Analyzer (FOSS Analytical  
479 AB, Höganäs, Sweden), which is a true Near Infrared Transmission instrument that generates a  
480 spectrum from 850 to 1050 nm via the monochrome light source and mobile grating system. A

481 50-ml seed sample was used that allowed for 10 subsample readings reported on a 13 % moisture  
482 basis.

483

#### 484 **Ionic analysis**

485 Seed analysis was conducted as described in Ziegler et al. 2012. Briefly, single seeds  
486 from each quadrant were weighed using a custom-built seed weighing robot and then digested in  
487 concentrated nitric acid before loading onto an Elan ICP-MS. Internal standards were used to  
488 control for differences in dilution and sample injection. Leaf and soy products were analyzed in  
489 the same manner except that samples were added to digestion tubes by hand and weighed.  
490 Custom scripts were used to correct for internal standards and correct for sample weight.

491

#### 492 **Metabolomic analysis**

493 Metabolome analysis was done through Metabolomics Center, Roy J. Carver  
494 Biotechnology Center, University of Illinois at Urbana-Champaign. Frozen seeds with attached  
495 seed coats were homogenized in liquid nitrogen and about 25 mg FW was extracted at room  
496 temperature with 1 mL of 50% methanol followed by addition of 800  $\mu$ l of methanol:chloroform  
497 (1:2) as outlined in **Fig. S3**. Each extraction was followed by centrifugation (5 min at 15,000 g),  
498 and the supernatants were collected. With the exception of samples for analysis of coenzymes,  
499 final extracts were evaporated under vacuum at -60 °C and subjected to GC/MS analysis.

500

501 Metabolic profiling: Dried extracts were derivatized with 100  $\mu$ L methoxyamine hydrochloride  
502 (40 mg/ml in pyridine) for 90 min at 50 °C, then with 100  $\mu$ L MSTFA at 50 °C for 120 min, and  
503 following 2-hour incubation at room temperature. 5  $\mu$ L of the internal standard (hentriacontanoic  
504 acid, 10 mg/mL) was added to each sample prior to derivatization. Metabolites were analyzed  
505 using a GC-MS system (Agilent Inc, CA, USA) consisting of an Agilent 7890 gas  
506 chromatograph, an Agilent 5975 mass selective detector and a HP 7683B autosampler. Gas  
507 chromatography was performed on a ZB-5MS (60m $\times$ 0.32mm I.D. and 0.25 $\mu$ m film thickness)  
508 capillary column (Phenomenex, CA, USA). The inlet and MS interface temperatures were 250  
509 °C, and the ion source temperature was adjusted to 230 °C. An aliquot of 1  $\mu$ L was injected with  
510 the split ratio of 10:1. The helium carrier gas was kept at a constant flow rate of 2 ml/min. The  
511 temperature program was: 5-min isothermal heating at 70 °C, followed by an oven temperature

512 increase of 5 °C min<sup>-1</sup> to 310 °C and a final 10 min at 310 °C. The mass spectrometer was  
513 operated in positive electron impact mode (EI) at 69.9 eV ionization energy at m/z 30-800 scan  
514 range.

515  
516 Amino acid analysis: A 20 µl aliquot of the internal standard DL-chlorophenylalanine (1mg/ml  
517 in 0.1M HCl) was added to the extracts, dried under vacuum, derivatized with 50 µl of neat N-  
518 Methyl-N-tert-butyldimethylsilyltrifluoroacetamide (MTBSTFA), and 50 µL of acetonitrile at 80  
519 °C for 4 h, cooled to room temperature and centrifuged briefly to remove condensate from the  
520 top of tube prior to injection of 1 µL at 5:1 split ratio into the GC/MS system, which consisted of  
521 an Agilent 6890N (Agilent Inc, Palo Alto, CA, USA) gas chromatograph, an Agilent 5973 mass  
522 selective detector and Agilent 7683B autosampler. Gas chromatography was performed on a 60  
523 m ZB-5MS column with 0.32 mm inner diameter (I.D.) and 0.25 µm film thickness  
524 (Phenomenex, CA, USA) with injection temperature and MSD transfer line of 230 °C both, and  
525 the ion source adjusted to 230°C. The helium carrier gas was set at a constant flow rate of 2 ml  
526 min<sup>-1</sup>. The temperature program was 5 min at 150 °C, followed by an oven temperature ramp of 5  
527 °C min<sup>-1</sup> to 315 °C for a final 3 min. The mass spectrometer was operated in positive electron  
528 impact mode (EI) at 69.9 eV ionization energy in m/z 50-800 scan range. Acquired data were  
529 normalized to the internal standard (DL-p-Chlorophenylalanine) and sample fresh weight.  
530 Amino acid concentrations were calculated based on 2to 75 µgml<sup>-1</sup> standard curves.

531  
532 Free fatty acids, total fatty acids and coenzymes were also measured and values obtained used in  
533 the global analysis, but specific results are not presented. Detailed methods for the analysis are  
534 available on request.

535  
536 The spectra of all chromatogram peaks were compared with electron impact mass spectrum  
537 libraries NIST08 (NIST, MD, USA), W8N08 (Palisade Corporation, NY, USA), and a custom-  
538 built database (460 unique metabolites). All known artificial peaks were identified and removed.  
539 To allow comparison between samples, all data were normalized to the corresponding internal  
540 standard and the sample fresh weight (FW). The spectra of all chromatogram peaks were  
541 evaluated using the AMDIS 2.71 (NIST, MD, USA) program. Metabolite concentrations were  
542 reported as concentrations relative to the internal standard (*i.e.*, target compound peak area

543 divided by peak area of internal standard:  $N_i = X_i \cdot X_{IS}^{-1}$ ) per gram sample weight. The  
544 instrument variability was within the standard acceptance limit (5%).

545

546 Metabolites with more than 50% of missing data were removed and for the rest of the  
547 metabolites, any missing data was imputed with one-half of the minimum positive value in the  
548 original data assuming their level was below the instrument detection limit. MVA and  
549 visualization was performed with SIMCA-P+ 12.0 software (Umetrics AB, Umeå, Sweden) and  
550 MetaboAnalyst (Xia & Wishart 2011) using log-transformed and autoscaled data and validated  
551 by sevenfold Cross-Validation and permutation with 500 random. To address the problem of  
552 multiple comparisons the False Discovery Rate (FDR) test was adopted. (Storey 2002).

553

#### 554 **Data analysis**

555 Protein, oil, and elemental data were analyzed using R and the packages dplyr, ggplot2,  
556 grid, reshape2, qtlcharts and gplots. All data and analysis scripts used in the analysis are  
557 included as a supplemental file and are available on [www.ionomicshub.org](http://www.ionomicshub.org).

558

559

560

561 **Figure Legends:**

562 **(Figure 1.) Quadrants of a soybean plant.** The mature plant was divided into quadrants upon  
563 harvest and seed collected from each quadrant was analyzed separately for protein, oil, and  
564 mineral concentrations. Plot normalized data used the average of all four quadrants to normalize  
565 year, plot and line effects.

566 **(Figure 2.) Canopy gradients of seed composition traits before normalization and line and**  
567 **year effects on total accumulation.** (A) Composition gradients from the bottom to top of the  
568 canopy for cultivar ‘Cumberland.’ The plots display the quadrant average as a line with the 95%  
569 confidence interval calculated using standard error as the ribbon. (B) Year and line effects for  
570 each compositional trait, represented as boxplots. In A and B, protein and oil are expressed on a  
571 percent basis and minerals as  $\mu\text{g g}^{-1}$  dry weight.

572 **(Figure 3.) Canopy gradients of seed composition traits.** For each trait, the data was  
573 normalized to the plot average to remove the effect of environment and genotype. The plots  
574 display the quadrant average as a line with the 95% confidence interval calculated using standard  
575 error as the ribbon. (A) Percentage protein, percentage Oil and single seed weight. (B) Elements  
576 with a significant ( $p < 1 \text{ e } -10$ ) effect of gradient in an ANOVA analysis that included Entry,  
577 Year and Position.

578

579 **(Figure 4.) Correlation plot among composition traits.** Pearson correlation values between  
580 compositional traits. (A) Correlation across 832 quadrants normalized to the plot average. (B)  
581 Correlation across 208 plot means.

582

583 **(Figure 5.) Effect of altering microenvironment by removal of neighboring plants on**  
584 **compositional traits.** For each trait, the data was normalized to the plot average to remove the  
585 effect of environment and genotype. The plots display the quadrant average as a line with the  
586 95% confidence interval calculated using standard error as the ribbon. (A) Percentage protein  
587 and percentage Oil in 2010. (B) Elements (from 2010 and 2012) with a significant ( $p < 1 \times 10^{-10}$ )  
588 effect of gradient in an ANOVA analysis that included Entry, Year, Position and thinning.

589

590 **(Figure 6.) Difference in composition traits of seeds from top and bottom of the canopy is**  
591 **not correlated with seed fill period.** The difference in plot normalized composition between  
592 the top quad and the bottom quad for protein, oil and iron plotted versus the difference in seed  
593 fill period for 51 plots in 2012.

594

595 **(Figure 7.) Canopy differences in seed iron concentration are reflected in food products.** Fe  
596 content of the products from 3 replicates of seven lines (flour) and four lines (Milk and Okara).  
597 Boxplots display the five number summary (median, 25, and 75% percentile define the box, with  
598 whiskers extending to 1.5 x interquartile range).

599

600 **(Figure 8.) Canopy gradients of leaf composition traits.** For each trait, the data was  
601 normalized to the plot average to remove the effect of environment and genotype. The plots  
602 display the quadrant average as a line with the 95% confidence interval calculated using standard  
603 error as the ribbon. Elements with a significant ( $p < 1 \times 10^{-10}$ ) effect of gradient in an ANOVA  
604 analysis that included Entry, Collection Date and Position.

605

606 **(Figure 9.) Concentrations of selected primary metabolites in developing seeds.** (A),  
607 Sucrose; (B), citrate; and (C), asparagine. Boxplots display the five number summary (median,  
608 25, and 75% percentile define the box, with whiskers extending to 1.5 x interquartile range) for  
609 three replicates at each sampling time: 7AM, 12N, 7PM and the following morning at 7AM. The  
610 grey vertical bars represent the intervening night period. Sucrose and citrate values are relative  
611 concentrations, while asparagine is presented as  $\mu\text{g (g DW)}^{-1}$ .

612

613 **(Figure 10.) Concentrations of free amino acids in developing seeds.** Boxplots display the  
614 five number summary (median, 25, and 75% percentile define the box, with whiskers extending  
615 to 1.5 x interquartile range) for values from each sampling interval (3 replicates and 4 time  
616 points are merged within each box) and nodal position. Ornithine levels reflect both ornithine  
617 and arginine as arginine is converted to ornithine during sample prep for GC-MS. D1.bot, D1.top  
618 and D7.top refer to the samples collected on day one top and bottom quadrants and the day seven  
619 top quadrant respectively.

620



621

622 **Supplementary tables and figures**

623 Table S1. Indeterminate lines used in the present study and selected characteristics

624 Table S2. Weather summary (June 1– August 31) during the 2010 to 2012 growing seasons

625 Table S3. Genotype differences in Seed fill period (SFP) and the difference in SFP at two node  
626 positions (bottom minus top;  $\Delta$ SFP)

627

628 Figure S1. Absolute mineral concentrations in 3 years of study. The plots display the quadrant  
629 average as a line with the 95% confidence interval calculated using standard error as the ribbon.

630 Figure S2. Experimental protocol for sampling developing soybean seeds for metabolomic  
631 analysis.

632 Figure S3. Schematic representation of sample fractionation for global metabolite analysis.

633 Figure S4. Global analysis of metabolome of developing soybean seeds. (A) PLS-DA scores plot  
634 ( $R^2 = 98.7\%$ ,  $Q^2 = 81.1\%$ ,  $P < 0.001$  by permutation test) of soybean seeds at different canopy  
635 position and time of day. (B) Variable Importance in the Projection (VIP) for the first component  
636 showing the fifteen most important compounds.

637

638

## 639 **Acknowledgements**

640 The authors thank Kunming University of Science and Technology (KUST), Kunming City, P.R.  
641 China for supporting the visit of Prof. Kunzhi Li to UIUC; Karl E. Weingarter and Marilyn L.  
642 Nash for advice on soy food preparation and providing access to the Test Kitchen facility of the  
643 National Soybean Research Laboratory at the University of Illinois; Greg Ziegler for expert  
644 technical assistance with ionomic analysis and Sarah Schultz for help with field sampling.  
645 Support for this work was provided by the United Soybean Board and the USDA-ARS.

646

647

## 648 **REFERENCES**

- 649 Baldocchi DD, Verma SB, and Rosenberg NJ. 1983. Microclimate in the soybean canopy. *Agricultural*  
650 *Meteorology* 28:321-337. [http://dx.doi.org/10.1016/0002-1571\(83\)90009-2](http://dx.doi.org/10.1016/0002-1571(83)90009-2)
- 651 Baxter I. 2009. Ionomics: studying the social network of mineral nutrients. *Current Opinion in Plant*  
652 *Biology* 12:381-386. <http://dx.doi.org/10.1016/j.pbi.2009.05.002>
- 653 Biodner C, Goebel C, Feussner I, Gatz C, and Polle A. 2007. Warm and cold parental reproductive  
654 environments affect seed properties, fitness, and cold responsiveness in *Arabidopsis thaliana*  
655 progenies. *Plant, Cell & Environment* 30:165-175. 10.1111/j.1365-3040.2006.01615.x
- 656 Carrera C, Martínez MJ, Dardanelli J, and Balzarini M. 2009. Water Deficit Effect on the Relationship  
657 between Temperature during the Seed Fill Period and Soybean Seed Oil and Protein  
658 Concentrations. *Crop Science* 49:990-998. 10.2135/cropsci2008.06.0361
- 659 Carrera C, Martínez MJ, Dardanelli J, and Balzarini M. 2011. Environmental Variation and Correlation of  
660 Seed Components in Nontransgenic Soybeans: Protein, Oil, Unsaturated Fatty Acids,  
661 Tocopherols, and Isoflavones. *Crop Science* 51:800-809. 10.2135/cropsci2010.06.0314
- 662 Collakova E, Aghamirzaie D, Fang Y, Klumas C, Tabataba F, Kakumanu A, Myers E, Heath L, and Grene R.  
663 2013. Metabolic and Transcriptional Reprogramming in Developing Soybean (*Glycine max*)  
664 Embryos. *Metabolites* 3:347-372.
- 665 Collins FI, and Cartter JL. 1956. Variability in Chemical Composition of Seed From Different Portions of  
666 the Soybean Plant1. *Agron J* 48:216-219. 10.2134/agronj1956.00021962004800050006x
- 667 Drossopoulos JB, Bouranis DL, and Bairaktari BD. 1994. Patterns of mineral nutrient fluctuations in  
668 soybean leaves in relation to their position. *Journal of Plant Nutrition* 17:1017-1035.  
669 10.1080/01904169409364785
- 670 Duke SO, Reddy KN, Bu K, and Cizdziel JV. 2012. Effects of Glyphosate on the Mineral Content of  
671 Glyphosate-Resistant Soybeans (*Glycine max*). *Journal of Agricultural and Food Chemistry*  
672 60:6764-6771. 10.1021/jf3014603
- 673 Escalante EE, and Wilcox JR. 1993a. Variation in Seed Protein among Nodes of Determinate and  
674 Indeterminate Soybean near-Isolines. *Crop Science* 33:1166-1168.
- 675 Escalante EE, and Wilcox JR. 1993b. Variation in Seed Protein among Nodes of Normal-Protein and High-  
676 Protein Soybean Genotypes. *Crop Science* 33:1164-1166.
- 677 Evans TA, Fuhrmann JJ, Nelson RL, and Vasilas BL. 1995. Relationship of nitrogen utilization patterns  
678 with soybean yield and seed-fill period. *Crop Science* 35:809+.

- 679 Grusak MA, DellaPenna D, and Welch RM. 1999. Physiologic processes affecting the content and  
680 distribution of phytonutrients in plants. *Nutrition reviews* 57:27-33.
- 681 Herman E. 2014a. Soybean Seed Proteome Rebalancing. *Frontiers in Plant Science* 5.  
682 10.3389/fpls.2014.00437
- 683 Herman EM. 2014b. Soybean seed proteome rebalancing. *Front Plant Sci* 5:437.  
684 10.3389/fpls.2014.00437
- 685 Hernandez-Sebastia C, Marsolais F, Saravitz C, Israel D, Dewey RE, and Huber SC. 2005. Free amino acid  
686 profiles suggest a possible role for asparagine in the control of storage-product accumulation in  
687 developing seeds of low- and high-protein soybean lines. *J Exp Bot* 56:1951-1963.  
688 10.1093/jxb/eri191
- 689 Hocking PJ, and Pate JS. 1977. Mobilization of Minerals to Developing Seeds of Legumes. *Annals of*  
690 *Botany* 41:1259-1278.
- 691 Jiménez MP, Efrón D, de la Horra AM, and Defrieri R. 1996. Foliar potassium, calcium, magnesium, zinc,  
692 and manganese content in soybean cultivars at different stages of development. *Journal of Plant*  
693 *Nutrition* 19:807-816. 10.1080/01904169609365163
- 694 Krishnan HB, Jang S, Baxter I, and Wiebold WJ. 2012. Growing location has a pronounced effect on the  
695 accumulation of cancer chemopreventive agent Bowman-Birk inhibitor in soybean seeds. *Crop*  
696 *Science* 52. 10.2135/cropsci2011.11.0593
- 697 Loladze I. 2014. Hidden shift of the ionome of plants exposed to elevated CO<sub>2</sub> depletes minerals at the  
698 base of human nutrition. *Elife* 3. 10.7554/eLife.02245
- 699 Matilla A, Gallardo M, and Puga-Hermida MI. 2005. Structural, physiological and molecular aspects of  
700 heterogeneity in seeds: a review. *Seed Science Research* 15:63-76. doi:10.1079/SSR2005203
- 701 McGrath JM, and Lobell DB. 2013. Reduction of transpiration and altered nutrient allocation contribute  
702 to nutrient decline of crops grown in elevated CO<sub>2</sub> concentrations. *Plant Cell Environ* 36:697-  
703 705. 10.1111/pce.12007
- 704 McLean E, Cogswell M, Egli I, Wojdyla D, and de Benoist B. 2009. Worldwide prevalence of anaemia,  
705 WHO Vitamin and Mineral Nutrition Information System, 1993-2005. *Public Health Nutr* 12:444-  
706 454. 10.1017/S1368980008002401
- 707 Miller AJ, Fan X, Shen Q, and Smith SJ. 2008. Amino acids and nitrate as signals for the regulation of  
708 nitrogen acquisition. *J Exp Bot* 59:111-119. 10.1093/jxb/erm208
- 709 Myers SS, Zanobetti A, Kloog I, Huybers P, Leakey AD, Bloom AJ, Carlisle E, Dietterich LH, Fitzgerald G,  
710 Hasegawa T, Holbrook NM, Nelson RL, Ottman MJ, Raboy V, Sakai H, Sartor KA, Schwartz J,  
711 Seneweera S, Tausz M, and Usui Y. 2014. Increasing CO<sub>2</sub> threatens human nutrition. *Nature*  
712 510:139-142. 10.1038/nature13179
- 713 Pandurangan S, Pajak A, Molnar SJ, Cober ER, Dhaubhadel S, Hernandez-Sebastia C, Kaiser WM, Nelson  
714 RL, Huber SC, and Marsolais F. 2012. Relationship between asparagine metabolism and protein  
715 concentration in soybean seed. *J Exp Bot* 63:3173-3184. 10.1093/jxb/ers039
- 716 Pandurangan S, Pajak A, Rintoul T, Beyaert R, Hernandez-Sebastia C, Brown DC, and Marsolais F. 2015.  
717 Soybean seeds overexpressing asparaginase exhibit reduced nitrogen concentration. *Physiol*  
718 *Plant*. 10.1111/ppl.12341
- 719 Raboy V, and Dickinson DB. 1987. The timing and rate of phytic Acid accumulation in developing  
720 soybean seeds. *Plant Physiol* 85:841-844.
- 721 Rotundo JL, and Westgate ME. 2009. Meta-analysis of environmental effects on soybean seed  
722 composition. *Field Crops Research* 110:147-156. <http://dx.doi.org/10.1016/j.fcr.2008.07.012>
- 723 Saldivar X, Wang Y-J, Chen P, and Hou A. 2011. Changes in chemical composition during soybean seed  
724 development. *Food Chemistry* 124:1369-1375.  
725 <http://dx.doi.org/10.1016/j.foodchem.2010.07.091>

- 726 Sankaran RP, and Grusak MA. 2014. Whole shoot mineral partitioning and accumulation in pea (*Pisum*  
727 *sativum*). *Front Plant Sci* 5:149. 10.3389/fpls.2014.00149
- 728 Seddigh M, and Jolliff GD. 1986. Remobilization Patterns of C and N in Soybeans with Different Sink-  
729 Source Ratios Induced by Various Night Temperatures. *Plant Physiology* 81:136-141.
- 730 Sha Z, Oka N, Watanabe T, Tampubolon BD, Okazaki K, Osaki M, and Shinano T. 2012. Ionome of  
731 soybean seed affected by previous cropping with mycorrhizal plant and manure application. *J*  
732 *Agric Food Chem* 60:9543-9552. 10.1021/jf3024744
- 733 Storey JD. 2002. A direct approach to false discovery rates. *Journal of the Royal Statistical Society: Series*  
734 *B (Statistical Methodology)* 64:479-498. 10.1111/1467-9868.00346
- 735 Streeter JG, and Jeffers DL. 1979. Distribution of Total Non-Structural Carbohydrates in Soybean Plants  
736 Having Increased Reproductive Load. *Crop Science* 19:729-734.  
737 10.2135/cropsci1979.0011183X001900050046x
- 738 Tricker P, López C, Gibbings G, Hadley P, and Wilkinson M. 2013. Transgenerational, Dynamic  
739 Methylation of Stomata Genes in Response to Low Relative Humidity. *International Journal of*  
740 *Molecular Sciences* 14:6674-6689.
- 741 Vasconcelos MW, Clemente T, and Grusak MA. 2014. Evaluation of constitutive iron reductase (AtFRO2)  
742 expression on mineral accumulation and distribution in soybean (*Glycine max. L*). *Frontiers in*  
743 *Plant Science* 5. 10.3389/fpls.2014.00112
- 744 Vreugdenhil D, Aarts MGM, Koornneef M, Nelissen H, and Ernst WHO. 2004. Natural variation and QTL  
745 analysis for cationic mineral content in seeds of *Arabidopsis thaliana*. *Plant, Cell & Environment*  
746 27:828-839. 10.1111/j.1365-3040.2004.01189.x
- 747 Waters BM, and Grusak MA. 2008. Whole-plant mineral partitioning throughout the life cycle in  
748 *Arabidopsis thaliana* ecotypes Columbia, Landsberg erecta, Cape Verde Islands, and the mutant  
749 line ysl1ysl3. *New Phytol* 177:389-405. 10.1111/j.1469-8137.2007.02288.x
- 750 Wilcox JR. 1998. Increasing Seed Protein in Soybean with Eight Cycles of Recurrent Selection. *Crop Sci*  
751 38:1536-1540. 10.2135/cropsci1998.0011183X003800060021x
- 752 Wolf RB, Cavins JF, Kleiman R, and Black LT. 1982. Effect of temperature on soybean seed constituents:  
753 Oil, protein, moisture, fatty acids, amino acids and sugars. *Journal of the American Oil Chemists'*  
754 *Society* 59:230-232. 10.1007/BF02582182
- 755 Xia J, and Wishart DS. 2011. Web-based inference of biological patterns, functions and pathways from  
756 metabolomic data using MetaboAnalyst. *Nat Protocols* 6:743-760.
- 757 Ziegler G, Terauchi A, Becker A, Armstrong P, Hudson K, and Baxter I. 2013. Ionomic Screening of Field-  
758 Grown Soybean Identifies Mutants with Altered Seed Elemental Composition. *The Plant Genome*  
759 6. 10.3835/plantgenome2012.07.0012

760
